RESEARCH ARTICLE

# Cranial Anatomy and Palaeoneurology of the Archosaur *Riojasuchus tenuisiceps* from the Los Colorados Formation, La Rioja, Argentina

Maria Belen von Baczko<sup>1,2\*</sup>, Julia Brenda Desojo<sup>1,2</sup>

**1** Consejo Nacional de Investigaciones Científicas y Técnicas (CONICET), Ciudad Autónoma de Buenos Aires, Buenos Aires, Argentina, **2** Sección Paleontología Vertebrados, Museo Argentino de Ciencias Naturales, Ciudad Autónoma de Buenos Aires, Buenos Aires, Argentina

\* [belen\\_vb@macn.gov.ar](mailto:belen_vb@macn.gov.ar)

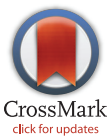

## Abstract

*Riojasuchus tenuisiceps* Bonaparte 1967 is currently known from four specimens, including two complete skulls, collected in the late 1960s from the upper levels of the Los Colorados Formation (Late Triassic), La Rioja, Argentina. Computed tomography (CT) scans of the skulls of the holotype and a referred specimen of *Riojasuchus tenuisiceps* and the reparation of the latter allows recognition of new features for a detailed analysis of its cranial anatomy and its comparison with a wide variety of other archosauriform taxa. The diagnosis of *Riojasuchus tenuisiceps* is emended and two autapomorphies are identified on the skull: (1) a deep antorbital fossa with its anterior and ventral edges almost coinciding with the same edges of the maxilla itself and (2) a suborbital fenestra equal in size to the palatine-ptyergoid fenestra. Also, the first digital 3D reconstruction of the encephalon of *Riojasuchus tenuisiceps* was carried out to study its neuroanatomy, showing a shape and cranial nerve disposition consistent to that of other pseudosuchians.

## OPEN ACCESS

**Citation:** von Baczko MB, Desojo JB (2016) Cranial Anatomy and Palaeoneurology of the Archosaur *Riojasuchus tenuisiceps* from the Los Colorados Formation, La Rioja, Argentina. PLoS ONE 11(2): e0148575. doi:10.1371/journal.pone.0148575

**Editor:** Andrew A. Farke, Raymond M. Alf Museum of Paleontology, UNITED STATES

**Received:** October 25, 2015

**Accepted:** January 19, 2016

**Published:** February 5, 2016

**Copyright:** © 2016 von Baczko, Desojo. This is an open access article distributed under the terms of the [Creative Commons Attribution License](https://creativecommons.org/licenses/by/4.0/), which permits unrestricted use, distribution, and reproduction in any medium, provided the original author and source are credited.

**Data Availability Statement:** All relevant data are within the paper.

**Funding:** The research was funded by the Agencia Nacional de Promoción Científica y Tecnológica (ANPCyT) through PICT 2014-609 granted to JBD and the European collection visits were funded by a project granted to MBvB during 2014 by the Deutscher Akademischer Austausch Dienst (DAAD). The funders had no role in study design, data collection and analysis, decision to publish, or preparation of the manuscript.

## Introduction

Ornithosuchidae is a clade of pseudosuchian archosaurs known from Upper Triassic continental beds along with aetosaurs, gracilisuchids, “rauisuchians”, and basal crocodylomorphs [1, 2]. Ornithosuchids are terrestrial quadrupedal carnivorous archosaurs with sizes ranging from 2 to 4 m. They have distinctive features such as a strongly downturned premaxilla, a two-tooth diastema between the premaxilla and maxilla, the lower jaws shorter than the skull, the presence of a palatine-ptyergoid fenestra, and a unique “crocodile-reversed” ankle articulation, only known in this group, which consists of a tarsal articulation with a ventral concavity on the astragalus and a convexity on the calcaneum [3,4,5]. Ornithosuchidae currently comprises three species: *Riojasuchus tenuisiceps* [6], *Venaticosuchus rusconii* [7], and *Ornithosuchus longidens* [8]. The first two are known from the Ischigualasto-Villa Union Basin, La Rioja, Argentina, and the latter from the Lossiemouth Sandstones Formation (late Carnian–early Norian [9]), Moray, Scotland.

**Competing Interests:** The authors have declared that no competing interests exist.

*Riojasuchus tenuisiceps* is presently represented by four individuals of similar size found in the Los Colorados Formation (Norian [10]), La Rioja, Argentina. They were collected from the upper section of this formation and are part of the very rich and diverse Coloradian fauna [11]. The species was erected by Bonaparte in 1967 and later described by the same author in 1972, highlighting the similarities and differences with its Scottish relative *Ornithosuchus longidens*. The latter is the only ornithosuchid known from the northern hemisphere (Lossiemouth Sandstones Formation, Moray, Scotland) and consists of 11 specimens from different ontogenetic stages, preserved mainly as moulds along with some cranial and skeletal three-dimensional elements. It was the first ornithosuchid to be described [8], later on utilized by Huene [12] to erect the clade Ornithosuchidae, and reassessed and redescribed in great detail by Walker [13]. In 1970, *Venaticosuchus rusconii* was briefly described by Bonaparte as a new ornithosuchid because of its overall similarities with *Riojasuchus tenuisiceps* and *Ornithosuchus longidens*. *Venaticosuchus rusconii* was collected from the Ischigualasto Formation (late Carnian–early Norian [14]), La Rioja, Argentina, and is represented only by a fragmentary skull. It was recently described in detail and included for the first time within a quantitative analysis to test its phylogenetic affinities by Baczko 2012 [15] and Baczko et al. 2014 [4].

For this contribution, a detailed anatomical study of the skull of *Riojasuchus tenuisiceps* is carried out revealing some of its distinctive features. New information is detailed about its previously unknown neuroanatomy, provided by the CT scans that we performed on both preserved skulls (PVL 3827, 3828). This contribution is one result of a broader project on the anatomy of Ornithosuchidae, which has already included an overview on the general aspects of the anatomy and evolution of this clade [3], a detailed redescription of *Venaticosuchus rusconii* [4], and a preliminary study of the olfactory cavities of *Riojasuchus tenuisiceps* and *Venaticosuchus rusconii* [16]. We hope it will enrich upcoming studies on the skeletal anatomy and phylogenetic relationships of Ornithosuchidae.

## Horizon and Locality

The fossils described here were collected in the upper beds of the Los Colorados Formation (Late Triassic), Quebrada de los Jachalleros (= Jachaleros; [17,18]), General Lavalle, La Rioja province, NW Argentina (Fig 1). This upper section of the Los Colorados Formation has yielded one of the most diverse and abundant faunas of the Late Triassic, the basis for the Coloradian (“Coloradense”) fauna [11]. The Coloradian fauna is mainly composed of pseudosuchians (ornithosuchids, “rauisuchians”, sphenosuchians, and protosuchians), avemetatarsalians (sauropodomorph and theropods), quelonids, and cynodonts. The available paleomagnetostratigraphic studies date the Los Colorados Formation at 227–213 Ma, corresponding to a Norian age [10].

## Materials and Methods

*Riojasuchus tenuisiceps* is currently represented by four specimens, two of which have almost completely preserved skulls (PVL 3827, 3828). The skull of PVL 3827 was scanned at the Clínica La Sagrada Familia, Buenos Aires, on a 64-channel axial CT scanner and the skull of PVL 3828 was scanned at MATSA, San Miguel de Tucumán, on a 16-channel axial CT scanner. In both cases, the settings were: field of view 421.0 mm, penetration power of 120.0 Kv and 279 mA, slice thickness of 0.8 mm and 0.4 mm of overlap. For the analysis of the CT images and 3D reconstruction, we used the open source software 3D Slicer v4.1.1. Terminology used for the description of the digital endocast does not refer strictly to the soft tissue regions of the brain because, as seen in modern archosaurs (e.g. *Alligator mississippiensis*: OUV 9761), the

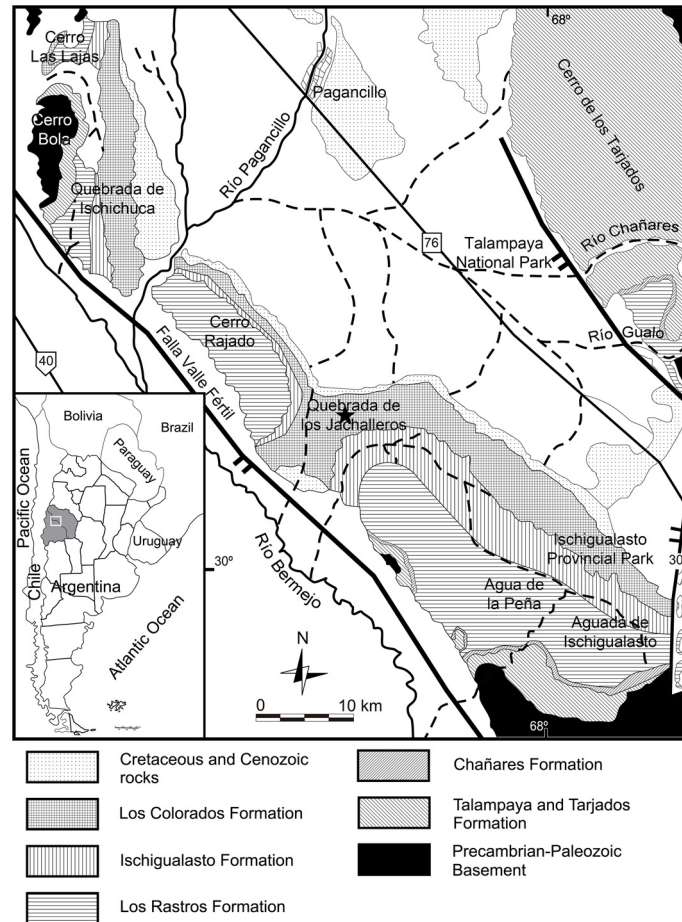

**Fig 1. Geological map of the Los Colorados Formation, Ischigualasto-Villa Unión Basin, La Rioja, Argentina.** Star indicates the location where the specimens were collected. Modified from Baczko et al. 2014.

doi:10.1371/journal.pone.0148575.g001

endocast also includes the volume occupied by other tissues surrounding the brain (e.i. vascular tissue) (e.g. [19, 20])

The skull of PVL 3828 was loaned by the Instituto Miguel Lillo, Tucumán, with the agreement of the curator Jaime Powell for its mechanical preparation with a micro jackhammer and its study at the Museo Argentino de Ciencias Naturales “Bernardino Rivadavia”, Buenos Aires. No specimens were purchased or donated for the purpose of this study. Measurements were made with a digital caliper set with a maximum deviation of 0.02 mm but measurements were rounded to the nearest 0.1 millimeter. Lengths were measured according to the anteroposterior axis of the elements of the skull, heights following the dorsoventral axis perpendicular to the lengths, and widths were measured following the mediolateral axis of the skull. Skull length was measured from the premaxilla to the quadrate.

All specimens studied first-hand for comparative purposes (indicated by the citation of their taxonomic name and respective collection accession numbers) were studied with the permission of appropriate curators and/or collection managers (see Acknowledgements), in recognized, scientifically accessible collections. Repository locations and abbreviations for all specimens discussed in the text are as follows:

**BSPG**, Bayerische Staatssammlung für Paläontologie und Geologie, München, Germany; **CPEZ**, Coleção Municipal, São Pedro do Sul, Brazil; **EM**, Elgin Museum, Elgin, Scotland; **GPIT**, Institut und Museum für Geologie und Paläontologie der Universität Tübingen, Tübingen, Germany; **MACN-HE**, División Herpetología, Museo Argentino de Ciencias Naturales Bernardino Rivadavia, Buenos Aires, Argentina; **MCZD**, Marischal College, Zoology Department, Aberdeen, Scotland; **NHMUK PV R**, Natural History Museum, London, UK; **OUVC**, Ohio University, Vertebrate Collection, Athens, Ohio, USA; **PULR**, Museo de Paleontología, Universidad Nacional de La Rioja, La Rioja, Argentina; **PVL**, Paleontología de Vertebrados, Instituto Miguel Lillo, Tucumán, Argentina; **PVSJ**, Paleontología, Museo de Ciencias Naturales, Universidad Nacional de San Juan, San Juan, Argentina; **SAM-PK**, Iziko South African Museum, Cape Town, South Africa; **SMNS**, Staatliches Museum für Naturkunde, Stuttgart, Germany; **TMM**, Texas Memorial Museum, Austin, Texas, USA; **UFRGS-PV**, Departamento de Paleontologia e Estratigrafia, Instituto de Geociências, Universidade Federal do Rio Grande do Sul, Brazil; **ZPAL**, Institute of Paleobiology, Polish Academy of Sciences, Warsaw.

## Systematic Palaeontology

Archosauria Cope 1869 [21] sensu Gauthier and Padian 1985 [22]

Pseudosuchia Zittel 1887–1890 [23] sensu Gauthier and Padian 1985 [22]

Ornithosuchidae Huene 1908 [12] sensu Sereno 1991 [5]

*Riojasuchus* Bonaparte 1967 [6]

*Riojasuchus tenuisiceps* Bonaparte 1967 [6]

Figs 2–7

**Holotype.** PVL 3827: The specimen has a complete and very well preserved skull and postcranial elements. The skull has the complete lower jaws, with the right hemimandible articulated and the left hemimandible disarticulated. The skeleton comprises 26 partially articulated vertebrae (19 presacral, 3 sacral, and 4 caudal), with articulated paramedial osteoderms in some cervical and dorsal regions; incomplete scapulocoracoids, incomplete humeri, a distal portion of left radius and ulna articulating with carpus; left ilium and pubis, left femur, left tibiae and fibulae articulating with complete pes.

**Referred material.** PVL 3828: This referred material is a skull with both articulated lower jaws that lacks part of the premaxillae and nasals, left jugal and lachrymal, both squamosals, left surangular, and right angular and articular. Moreover, this specimen includes several skeletal elements including 32 partially articulated vertebrae (20 presacral, 12 caudal); incomplete scapulocoracoids, humeri, radius, and ulnae; one carpal element isolated; left ilium and a fragmentary ischium; left femur; incomplete right femur, tibiae and fibulae; left calcaneum and several disarticulated phalanxes.

PVL 3826: This specimen is represented only by postcranial elements, namely 28 vertebrae (19 presacral and 9 caudal) partially articulated, two fragmentary scapulocoracoids, right humerus, fragments of the radius and ulna, incomplete right ilium, distal end of the left femur, and a fragmentary tibia.

PVL 3814: This specimen consists of postcranial material, such as some poorly preserved isolated vertebrae, proximal end of a humerus, fragment of a tibia, and several isolated osteoderms.

**Emended Diagnosis.** Ornithosuchid archosaur distinguished from other ornithosuchids by the following autapomorphies: (1) deep antorbital fossa with the anterior and ventral edges almost coinciding with the same edges of the maxilla itself; (2) suborbital fenestra equal in size to the palatine-pterygoid fenestra; (3) atlantal neural arch bases contact at the midline. *Riojasuchus tenuisiceps* is distinguished from all other archosauriforms by the combination of the

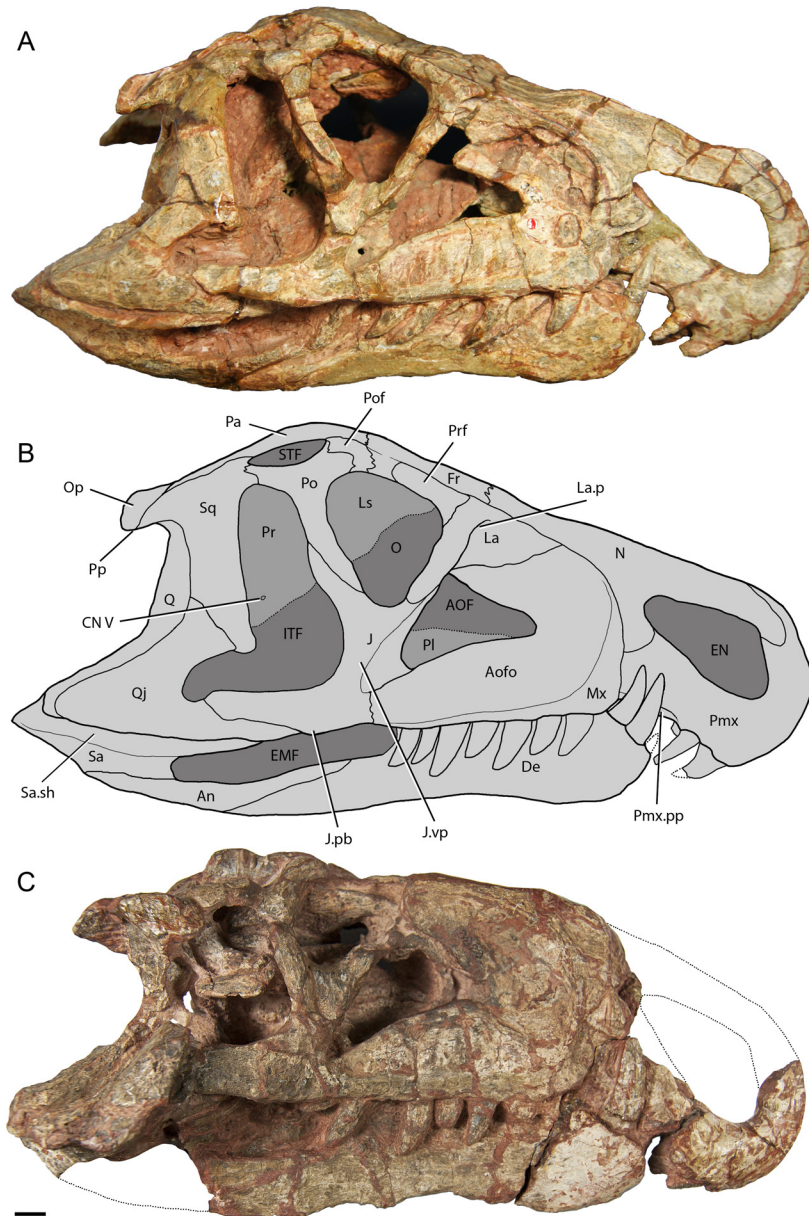

**Fig 2. Skulls of *Riojasuchus tenuisiceps* in right lateral view.** (A) Holotype PVL 3827; (B) reconstruction based on both specimens; (C) Referred specimen PVL 3828. *Abbreviations:* An, angular; AOF, antorbital fenestra; Aof, antorbital fossa; CN V, exit for cranial nerve V; De, dentary; EMF, external mandibular fenestra; EN, external nares; Fr, frontal; ITF, infratemporal fenestra; J, jugal; J.pb, protuberance of the jugal; J.vp, vertical process of the jugal; La, lacrimal; La.p, pocket on the lacrimal; Ls, laterosphenoid; Mx, maxilla; N, nasal; O, orbit; Op, opisthotic; Pa, parietal; Pfr, prefrontal; PI, palatine; Pmx, premaxilla; Pmx.pp, palatal process of the premaxilla; Po, postorbital; Pof, postfrontal; Pp, paroccipital process; Pr, prootic; Q, quadrate; Qj, quadratojugal; Sa, surangular; Sa.sh, surangular shelf; Sq, squamosal; STF, supratemporal fenestra. Scale bar: 1 cm.

doi:10.1371/journal.pone.0148575.g002

following features: (1) strongly down-turned premaxilla; (2) three premaxillary teeth; (3) 7 maxillary teeth; (4) second and third teeth on dentary hypertrophied; (5) two-tooth diastema between premaxilla and maxilla; (6) nasal-prefrontal contact absent; (7) jugal with vertical process separating antorbital fenestra from infratemporal fenestra; (8) orbit with ventral point

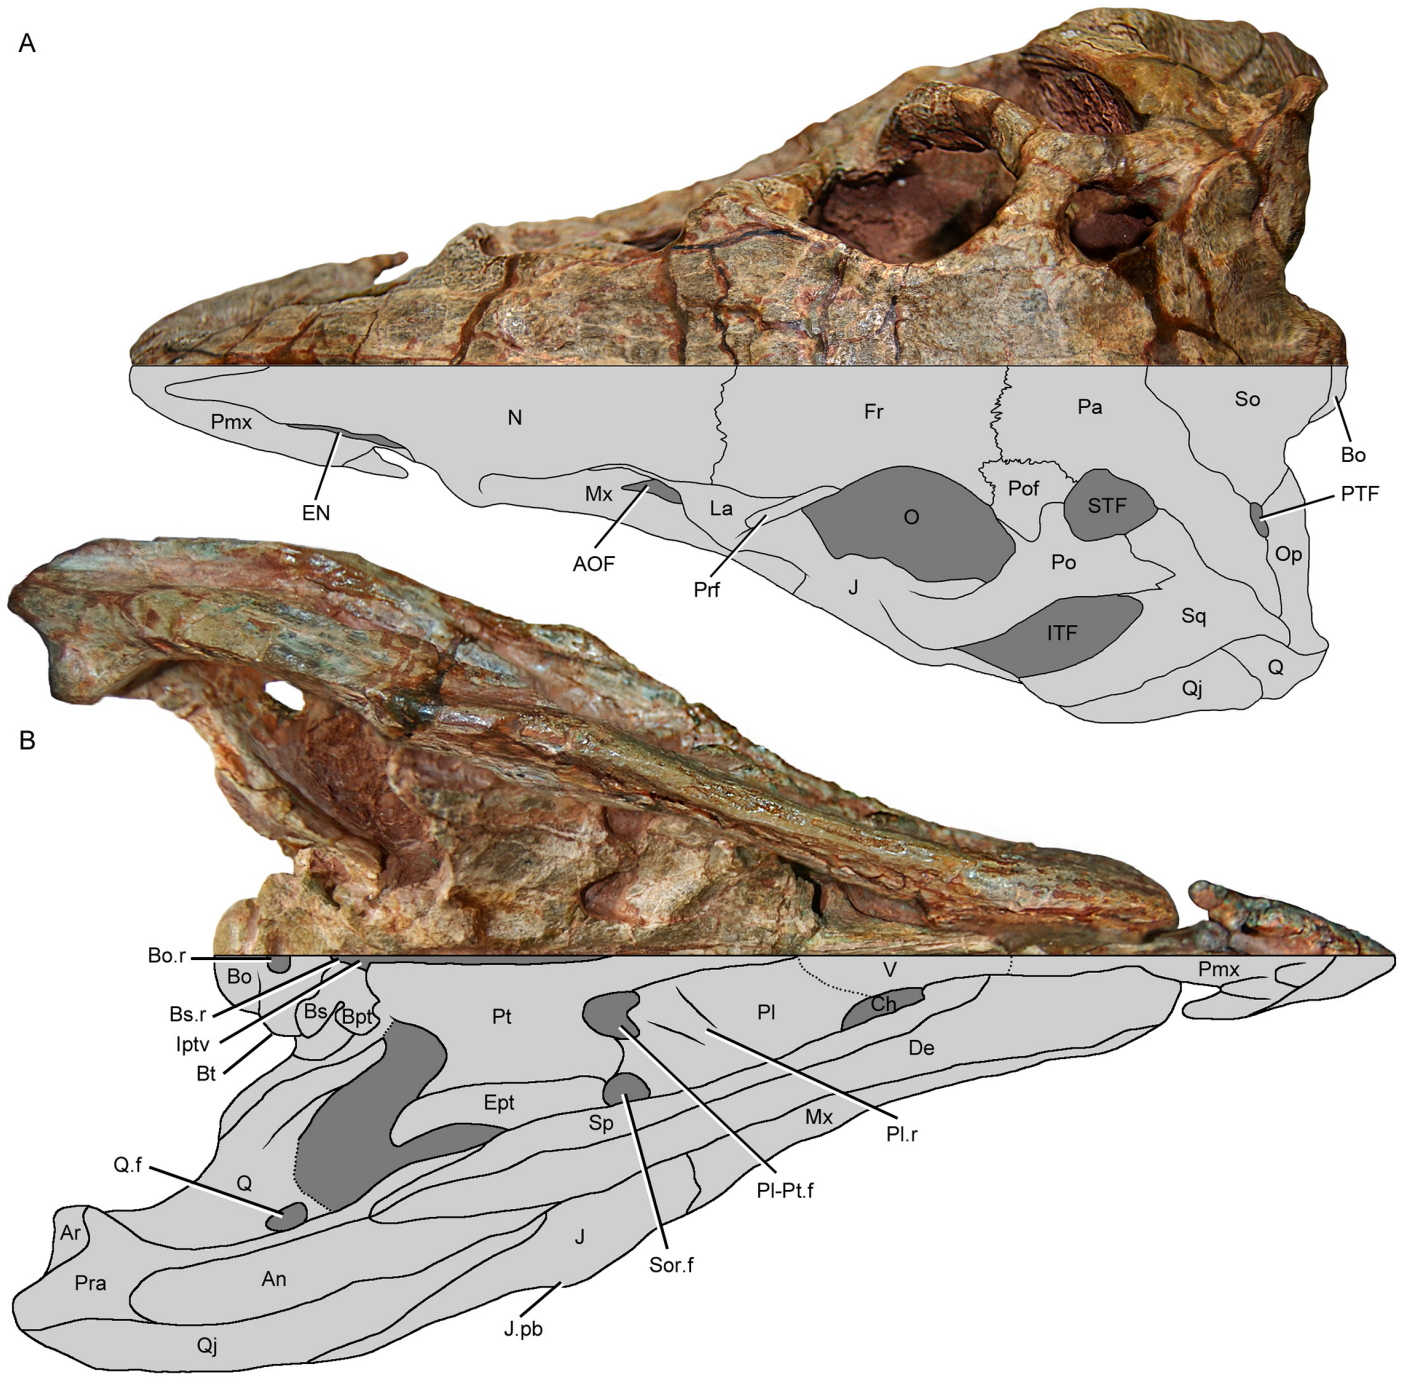

**Fig 3. Holotype skull of *Riojasuchus tenuisiceps* in dorsal and ventral view.** (A) dorsal view of PVL 3827; (B) ventral view of PVL 3827; (C) detail of possible palatine teeth. Lower halves as interpretative drawing. *Abbreviations:* AOF, antorbital fenestra; An, angular; Ar, articular; Bo, basioccipital; Bo.r, basioccipital recess; Bpt, basipterygoid process; Bs, basisphenoid; Bs.r, basisphenoid recess; Bt, basal tubera; Ch, choana; De, dentary; EN, external nares; Ept, ectopterygoid; Fr, frontal; Iptv, interpterygoid vacuity; ITF, infratemporal fenestra; J, jugal; J.pb, protuberance of the jugal; La, lacrimal; Mx, maxilla; N, nasal; O, orbit; Op, ophistotic; Pa, parietal; Pfr, prefrontal; PI, palatine; PI-Pt-f, palatine-pterygoid fenestra; Pl.r, palatine ridge; Pmx, premaxilla; Po, postorbital; Pof, postfrontal; Pra, prearticular; Pt, pterygoid; Q, quadrate; Q.f, quadrate foramen; Qj, quadratojugal; Sp, splenial; Sq, squamosal; STF, supratemporal fenestra; So, supraoccipital; Sor.f, Suborbital fenestra; V, vomer. Scale bar: 1cm.

doi:10.1371/journal.pone.0148575.g003

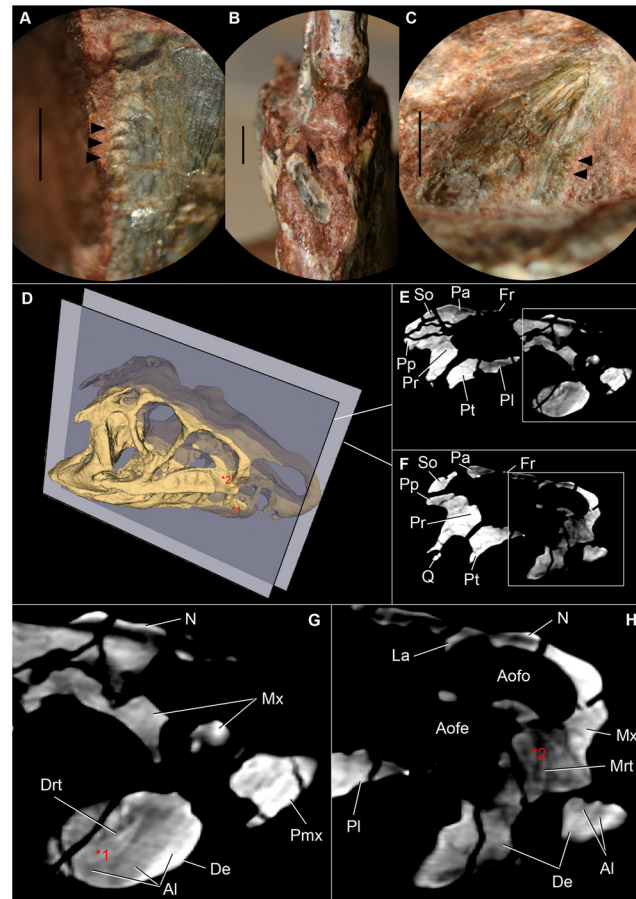

**Fig 4. Details of dentition of *Riojasuchus tenuisiceps*.** (A) lateral detail of denticles on distal margin of maxillary tooth (PVL 3828); (B) anterior view of first dentary tooth (PVL 3827) broken at its base; (C) medial view of posterior dentary tooth (PVL 3828) with denticles on distal margin; (D) 3D reconstruction of the skull of PVL 3827 indicating selected slices; (E-F) selected slices of PVL 3827; (G) detail of slide E indicating a maxillary replacement tooth (Mrt) erupting; (H) detail of slide F pointing out a dentary replacement tooth (Drt); \*1 and \*2 indicate the position of each replacement tooth on the skull. Arrowheads point at denticles. *Abbreviations:* Al, alveoli; Aofe, antorbital fenestra; Aofo, antorbital fossa; De, dentary; Drt, dentary replacement tooth; Fr, frontal; N, nasal; Mrt, maxillary replacement tooth; Mx, maxilla; Pa, parietal; Pl, palatine; Pmx, premaxilla; Pp, paroccipital process; Pr, prootic; Pt, pterygoid; Q, quadrate; So, supraoccipital. Scale bar: 2mm.

doi:10.1371/journal.pone.0148575.g004

surrounded by V-shaped dorsal processes of the jugal; (9) posterolateral process of the parietals anteriorly inclined greater than 45°; (10) reduced supratemporal fenestra; (11) L-shaped infra-temporal fenestra; (12) presence of a palatine-ptyergoid fenestra; (13) lower jaws shorter than skull; (14) presence of a first small tooth anterior to the two hypertrophied teeth; (15) anterior end of the dentary dorsally expanded; (16) dentary-splenial symphysis present along one-third of the lower jaw; (17) sharp surangular shelf; (18) presence of a surangular foramen; (19) ventral keel of cervical vertebrae extends ventral to the centrum rims; (2) pubis longer than 70% of femoral length; (21) anterior trochanter (= *M. iliofemoralis cranialis* insertion) forms a steep margin with the shaft but is completely connected to the shaft; (22) ventral astragalocalcaneal articular surface concavoconvex with concavity on astragalus; (23) metatarsal V without “hooked” proximal end.

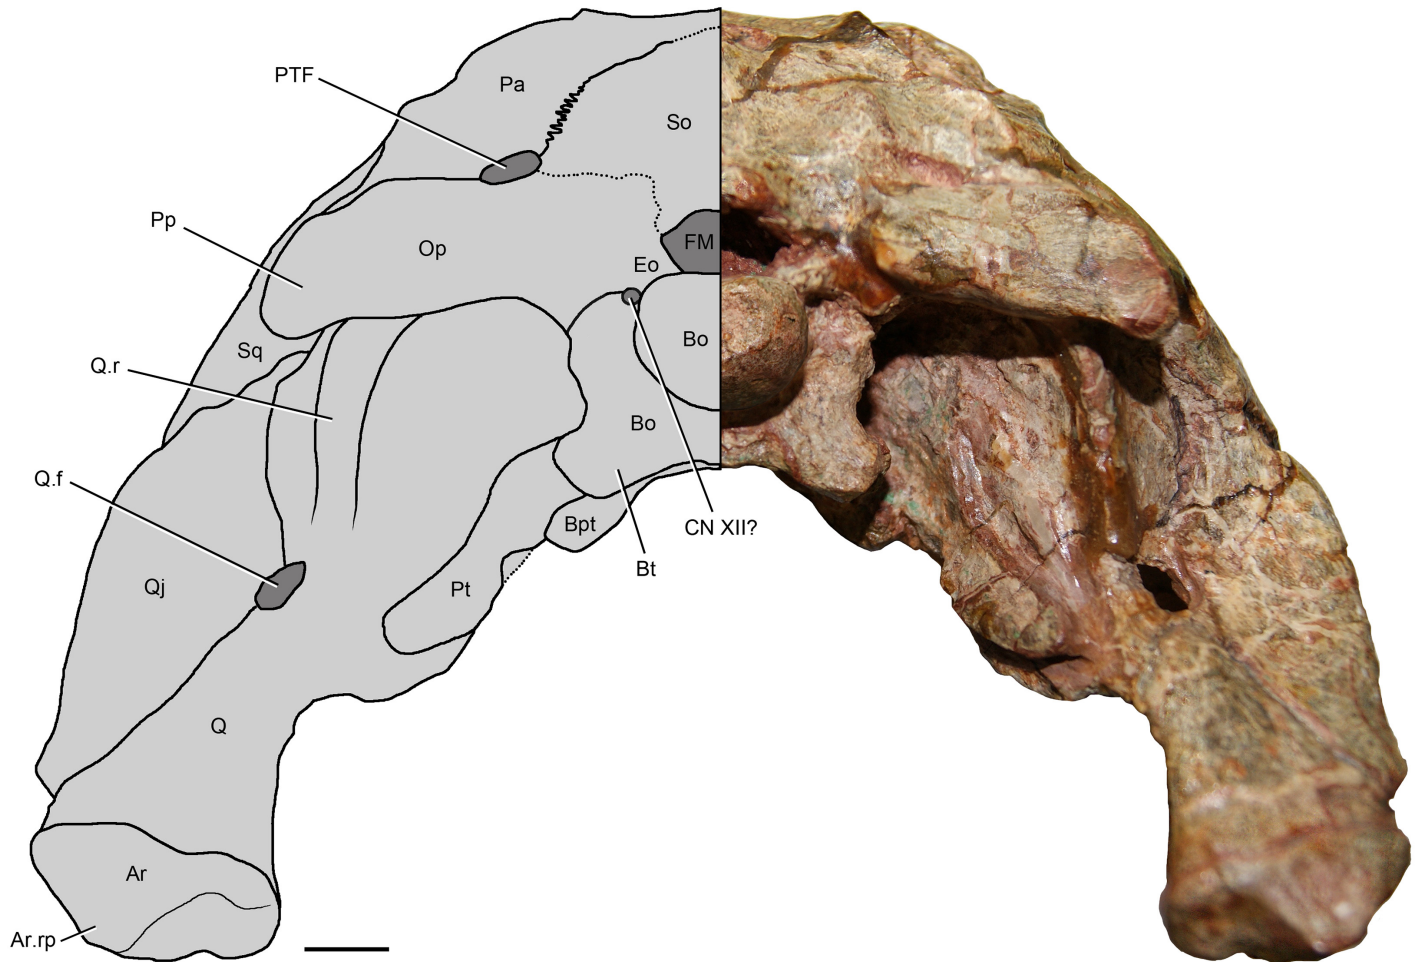

**Fig 5. Holotype skull of *Riojasuchus tenuisiceps* PVL 3827 in occipital view.** Left half as interpretative drawing. *Abbreviations:* Ar, articular; Ar,rp, retroarticular process of the articular; Bo, basioccipital; Bpt, basipterygoid process; Bt, basal tubera; CN XII?, possible exit for cranial nerve XII; Eo, exoccipital; FM, foramen magnum; Op, opisthotic; Pa, parietal; Pp, paroccipital process; Pt, pterygoid; PTF, posttemporal fenestra; Q, quadrate; Q.f, quadrate foramen; Q.r, quadrate ridge; Qj, quadratojugal; Sq, squamosal; So, supraoccipital. Scale bar: 1 cm.

doi:10.1371/journal.pone.0148575.g005

## Results

### Description and Comparisons

*Riojasuchus tenuisiceps* is represented by four specimens, but only two of them have associated skulls (PVL 3827, 3828), and on which we base our description. The skull of the holotype suffered some damage during its original mechanical preparation, probably because of the technology available during the 1970s when it was unearthed. The second skull (PVL 3828) has the posterior region of the skull roof crushed, but it was less damaged during its original preparation. This material was reprepared at the Museo Argentino de Ciencias Naturales “Bernardino Rivadavia” during 2012, which allow us to observe in detail new data for some of the regions that are damaged in the holotype specimen.

For this study, comparisons were made with original material of fossil archosauriforms studied first hand by both authors and through the primary literature, both listed in [Table 1](#).

**Skull.** The skull of *Riojasuchus tenuisiceps* is subtriangular in dorsal view, with a marked constriction on the ventral region of the premaxilla-maxilla contact and a wider constriction



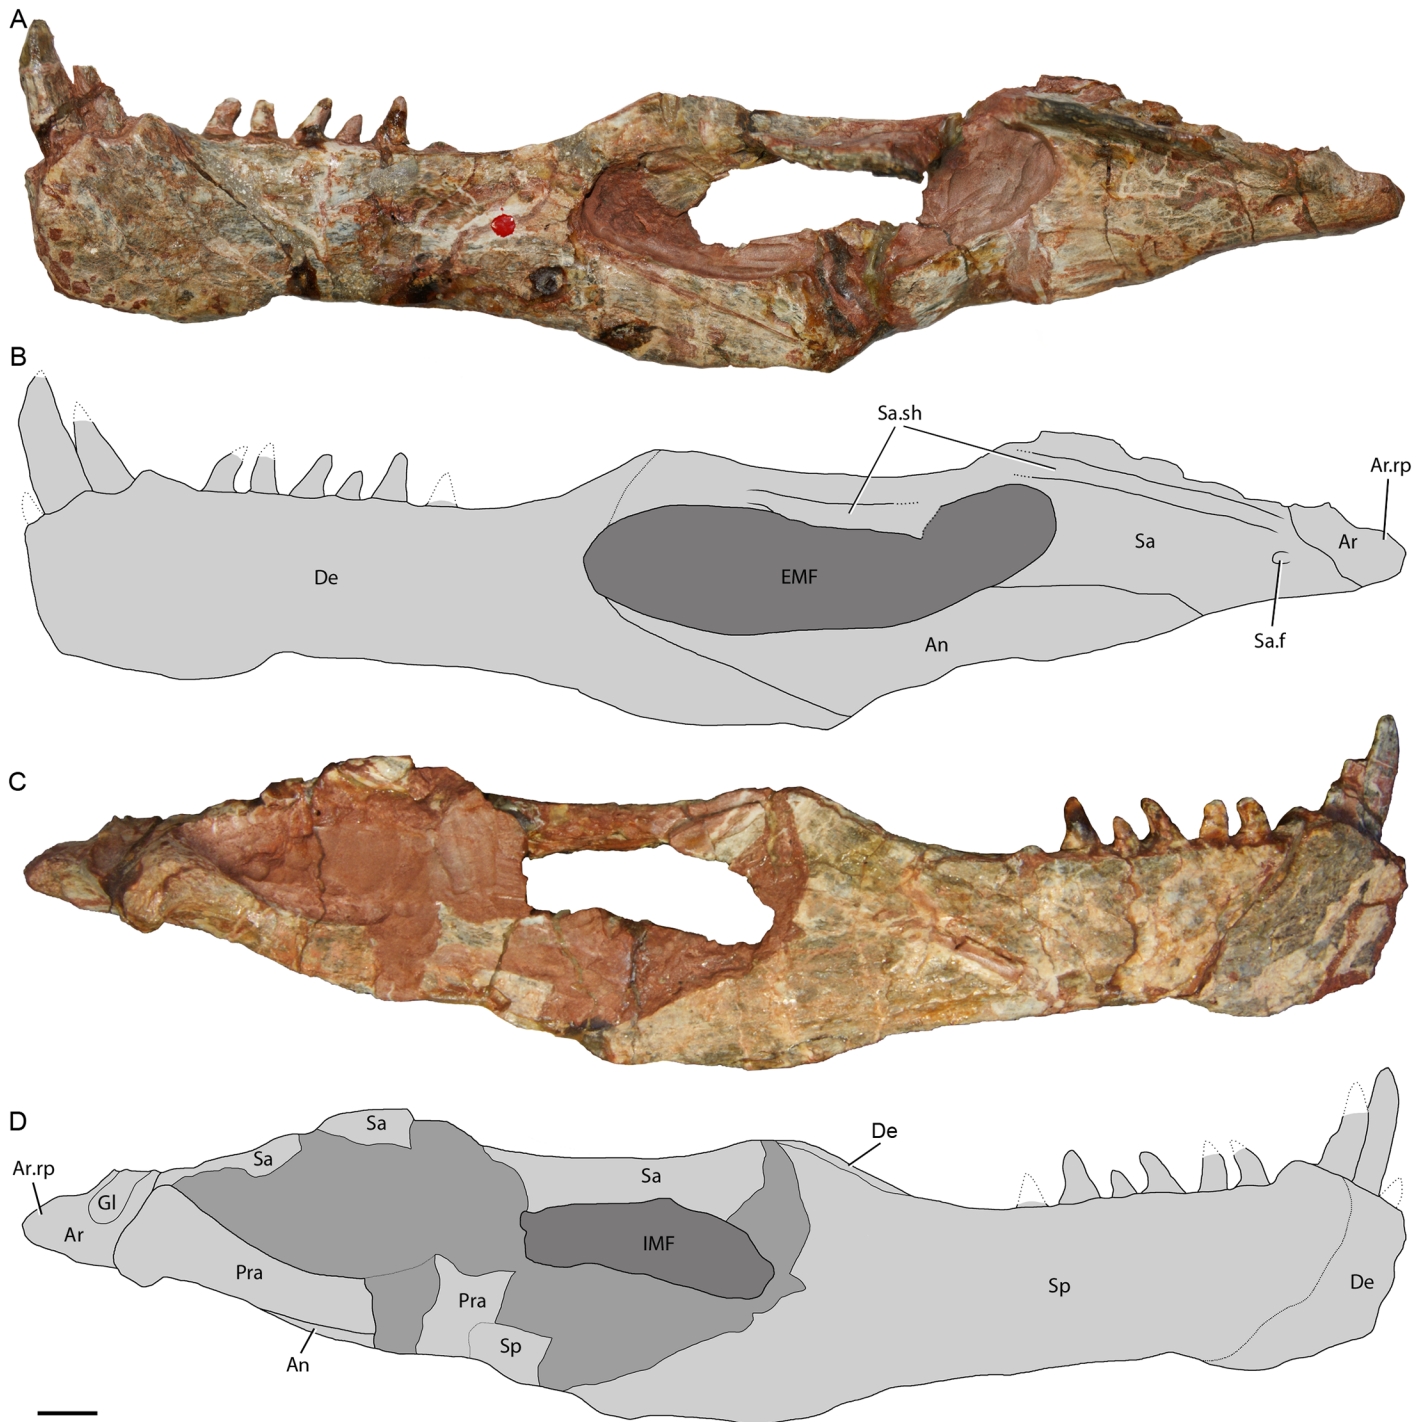

**Fig 6. Left hemimandible of holotype of *Riojasuchus tenuisiceps* PVL 3827.** (A) lateral view; (B) medial view. With interpretative drawings. *Abbreviations:* An, angular; Ar, articular; Ar.rp, retroarticular process of the articular; De, dentary; EMF, external mandibular fenestra; Gl, glenoid fossa; IMF, internal mandibular fenestra; Pra, prearticular; Sa, surangular; Sa.f, surangular foramen; Sa.sh, surangular shelf; Sp, splenial. Scale bar: 1 cm.

doi:10.1371/journal.pone.0148575.g006

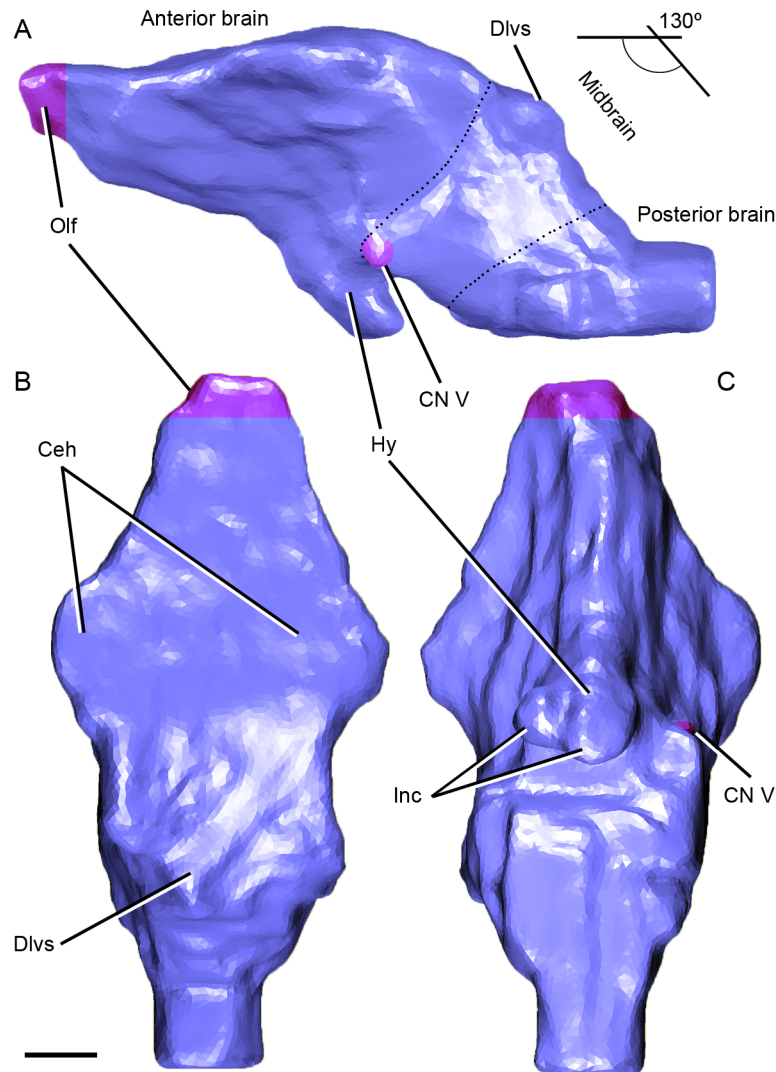

**Fig 7. Digital endocast of the braincase of *Riojasuchus tenuisiceps* PVL 3827.** (A) lateral, (B) dorsal, and (C) ventral view. *Abbreviations:* Ceh, cerebral hemispheres; CN V, cranial nerve V (trigeminal); Dlvs, dorsal longitudinal venous sinus; Hy, hypophysis; Inc, internal carotid arteries; Olf, olfactory tracts. Scale bar: 1 cm.

doi:10.1371/journal.pone.0148575.g007

between the orbits on the region of the frontals; it has a distinctive overhanging snout that extends anterior to the mandibles (Figs 2 and 3).

The **premaxilla** of *Riojasuchus tenuisiceps* is curved anteroventrally (= downturned, [1, 5]) and delimits the external naris on its anterior and posteroventral margins; it can be divided into three parts: a main body, a nasal process, and a maxillary process. The main body of the premaxilla is subrectangular on its anterior end and bears only three teeth (Fig 1A and 1B); this dental configuration is quite uncommon among archosauriforms and can be seen in the archosauriform *Euparkeria capensis* (cast of SAM-PK 5867), the pseudosuchians *Ornithosuchus longidens* (NHMUK PV R 3143), *Gracilisuchus stipanicorum* (PVL 4597), *Luperosuchus fractus* (PULR 057), *Saurosuchus galilei* (PVSJ 32), and the avemetatarsalian *Heterodontosaurus tucki* [86]. The premaxillary teeth are slightly laterally compressed and curved posteriorly; no serrations can be recognized on any of the preserved teeth (PVL 3827, PVL 3828), probably

**Table 1. List of comparative material.**

| Taxon                                | Reference                                                           | Reference Number                                      |
|--------------------------------------|---------------------------------------------------------------------|-------------------------------------------------------|
| <i>Proterosuchus fergusi</i>         | Gow 1975[24]; Welman 1998[25]; Ezcurra and Butler 2015 [26]         | -                                                     |
| <i>Erythrosuchus africanus</i>       | Gower 1997[27], 2003[28]                                            | -                                                     |
| <i>Garjainia madiba</i>              | Gower et al. 2014[29]                                               | -                                                     |
| <i>Doswellia kaltenbachi</i>         | Weems 1980[30]; Dilkes and Sues 2009[31]                            | -                                                     |
| <i>Chanaresuchus bonapartei</i>      | Romer 1971[32]; Trotteyn and Haro 2012[33]                          | PULR 07; PVL 4575, 4586, 4647                         |
| <i>Gualosuchus reigi</i>             | Romer 1971[32]; Dilkes and Arcucci 2012[34]                         | PULR 05; PVL 4576                                     |
| <i>Tropidosuchus romeri</i>          | Arcucci 1990[35]; Dilkes and Arcucci 2012[34]                       | PVL 4604, 4606                                        |
| <i>Euparkeria capensis</i>           | Ewer 1965[36]; Welman 1995[37]; Gower and Weber 1998 [38]           | SAM-PK 5867 (cast)                                    |
| <i>Mystriosuchus westphali</i>       | Hungerbühler and Hunt 2000[39]; Hungerbühler 2002[40]               | GPIT 261–001                                          |
| <i>Ornithosuchus longidens</i>       | Walker 1964[13]; Baczko and Ezcurra 2013[3]                         | EM 1, 15, 29; NHMUK PV R 2409, 3142, 3143, 3149, 3562 |
| <i>Venaticosuchus rusconii</i>       | Bonaparte 1970[7], Baczko et al. 2014[15]                           | PVL 2578                                              |
| <i>Gracilisuchus stipanicicorum</i>  | Romer 1972[41]; Lecuona and Desojo 2012[42]                         | PURL 08, PVL 4597, 4612                               |
| <i>Turfanosuchus dabaensis</i>       | Young 1973[43]; Wu and Russell 2001[44]                             | -                                                     |
| <i>Neoaetosauroides engaeus</i>      | Desojo and Baez 2007[45]                                            | PULR 108, PVL 3525, 4363, 5698                        |
| <i>Longosuchus meadei</i>            | Hunt and Lucas 1990[46]; Parrish 2010[47]                           | TMM 31185-84A/B                                       |
| <i>Stagonolepis robertsoni</i>       | Walker 1961[48]                                                     | MCZD 2–4                                              |
| <i>Aetosaurus ferratus</i>           | Schoch 2007[49]                                                     | SMNS 5770                                             |
| <i>Desmatosuchus spurensis</i>       | Parker 2008[50]                                                     | TTUP 9024 (cast)                                      |
| <i>Quianosuchus mixtus</i>           | Li et al. 2006[51]                                                  | -                                                     |
| <i>Arizonasaurus babbitti</i>        | Nesbitt 2005[52]; Gower and Nesbitt 2010[53]                        | -                                                     |
| <i>Shuvosaurus inexpectatus</i>      | Nesbitt and Norell 2006[54]; Lucas et al. 2007[55]; Nesbitt 2011[1] | -                                                     |
| <i>Effigia okeeffeae</i>             | Nesbitt 2007[56]                                                    | -                                                     |
| <i>Luperosuchus fractus</i>          | Desojo and Arcucci 2009[57], Nesbitt et al. 2013[58]                | PULR 04, 057                                          |
| <i>Prestosuchus chiniquensis</i>     | Barberena 1978[59]; Mastrantonio et al. 2013[60]                    | BSPG AS XXV 1-3/5-11/28-41/49, UFRGS PV 0629 T, 156 T |
| <i>Saurosuchus galilei</i>           | Alcober 2000[61]                                                    | PVL 2062, PVSJ 32                                     |
| <i>Batrachotomus kupferzellensis</i> | Gower 2002[62]                                                      | SMNS 52970, 80260–80339                               |
| <i>Fasolasuchus tenax</i>            | Bonaparte 1981[63]                                                  | PVL 3850, 3851                                        |
| <i>Rauisuchus tiradentes</i>         | Lautenschlager and Rauhut 2014[64]                                  | BSPG AS XXV 60–68, 71–100, 105–119, 121               |
| <i>Polonosuchus silesiacus</i>       | Sulej 2005[65]; Brusatte et al. 2009[66]                            | ZPAL Ab III 563                                       |
| <i>Postosuchus kirkpatricki</i>      | Weinbaum 2011[67]                                                   | -                                                     |
| <i>Dromicosuchus grillator</i>       | Sues et al. 2003[68]                                                | -                                                     |
| <i>Hesperosuchus agilis</i>          | Clark et al. 2000[69]                                               | -                                                     |
| <i>Sphenosuchus acutus</i>           | Walker 1990[70]                                                     | -                                                     |
| <i>Dibothrosuchus elaphros</i>       | Wu and Chatterjee 1993[71]                                          | -                                                     |
| <i>Litargosuchus leptorhynchus</i>   | Clark and Sues 2002[72]                                             | -                                                     |
| <i>Kayentasuchus walkeri</i>         | Clark and Sues 2002[72]                                             | -                                                     |
| <i>Protosuchus haughtoni</i>         | Gow 2000[73]                                                        | -                                                     |
| <i>Alligator mississippiensis</i>    | Brochu 1999[74]                                                     | OUVS 9761                                             |
| <i>Caiman yacare</i>                 | Bona and Desojo 2011[75]                                            | MACN-HE 43694                                         |
| <i>Marasuchus lilloensis</i>         | Sereno and Arcucci 1994[76]                                         | -                                                     |
| <i>Lewisuchus admixtus</i>           | Romer 1972[77]; Bittencourt et al. 2014[78]                         | PULR 01                                               |
| <i>Silesaurus opolensis</i>          | Dzik 2003[79]; Dzik and Sulej 2007[80]                              | -                                                     |

(Continued)

Table 1. (Continued)

| Taxon                          | Reference                                                  | Reference Number |
|--------------------------------|------------------------------------------------------------|------------------|
| <i>Sacisaurus agudoensis</i>   | Ferigolo and Langer 2007[81]; Langer and Ferigolo 2013[82] | -                |
| <i>Eoraptor lunensis</i>       | Sereno et al. 1993[83]; 2013[84]                           | -                |
| <i>Heterodontosaurus tucki</i> | Crompton and Charig 1962[85]; Norman et al. 2011[86]       | -                |

doi:10.1371/journal.pone.0148575.t001

because the area has been overprepared. The nasal process of the premaxilla is directed posterodorsally and is slightly curved posteriorly; it reaches the anterior process of the nasal at a V-shaped contact. The maxillary process is directed posteriorly; it is apparently laterally overlapped by the ventral process of the nasal on its posterodorsal end and by the maxilla posteriorly. The ventral margin of the maxillary process is edentulous and laterally compressed forming a diastema that holds two hypertrophied dentary teeth when the mandibles occlude, an autapomorphic condition for ornithosuchids (Fig 2). Because of the lateral compression of the premaxilla of *Riojasuchus tenuisiceps*, the palatal process is laminar (Fig 2B:Pmx.pp), laterally compressed and ventromedially oriented, and it can be seen in a lateral view, as is also the condition in the archosauriforms *Proterosuchus fergusi* and *Sarmatosuchus otschevi* [87]. Therefore, the maxillary processes of the premaxilla of *Riojasuchus tenuisiceps* (PVL 3827, 3828) contact each other along their entire medial surface, differing from the condition of wide-snouted archosaurs such as *Batrachotomus kupferzellensis* (SNMS 52970, 80260) and *Saurosuchus galilei* (PVSJ 32), in which the palatal process is medially directed and the maxillary processes of the premaxilla do not contact each other.

The **maxilla** is almost two times longer than the premaxilla (Table 2); it is anteriorly rounded and bifurcates posteriorly into an ascending process and a posterior process. It does not participate in the delimitation of the external naris (contra Bonaparte 1972[17]) (Fig 2B: Mx) as seen in the majority of archosauriforms (e.g. *Mystriosuchus westphali*: GPIT 261–001, *Ornithosuchus longidens*: NHMUK PV R 3143, *Gracilisuchus stipanicorum*: PVL 4612, *Saurosuchus galilei*: PVSJ 32, *Luperosuchus fractus*: PULR 057, *Silesaurus opolensis*: [79]), except for most aetosaurs [88], *Effigia okeeffeae* [56] and *Arizonasaurus babbitti* [52] in which the maxilla delimits a small part of this opening. The maxilla forms most of both the antorbital fenestra and antorbital fossa, which are also formed and delimited by the lachrymal posterodorsally and the jugal posteroventrally. The antorbital fenestra is subtriangular, with anterior and ventral acute angles (Fig 2B:AOF), and is surrounded by the nearly semicircular antorbital fossa (Fig 2B:Aof). This fossa has its anterior and ventral edges almost coinciding with the same edges of the maxilla itself (PVL 3827), unlike most archosaurs in which the ventral margin of the antorbital fossa does not reach the ventral margin of the maxilla (e.g. *Venaticosuchus rusconii*: PVL 2578; *Ornithosuchus longidens*: NHMUK PV R 2409, 3143; *Gracilisuchus stipanicorum*: PVL 4597; *Neoaeosauroides engaeus*: PVL 5698; *Silesaurus opolensis*: [79]). The lateral surface of the antorbital fossa is bulged at the level of the maxillary teeth alveoli, an uncommon feature; in most archosaurs the lateral surface is smooth. The right maxilla of the holotype of *Riojasuchus tenuisiceps* (PVL 3827) has a damaged rounded area on its anterior region caused by poor preparation; on this perforation it is possible to recognize the root of the first maxillary tooth which is twice as long as the tooth crown (Fig 2). No foramina can be recognized on the external surface of the maxilla.

There is no evidence of a palatal process on medial side the maxilla, probably because the area has been overprepared. The ascending process of the maxilla is posterodorsally directed and has the same dorsoventral height along its entire length; it contacts the nasal along its dorsal margin and it is laterally overlapped by the lachrymal on its posterior end. The posterior

**Table 2. Measurements of the skulls of PVL 3827 and 3828 (in cm).**

|                                           | PVL 3827 | PVL 3828 |
|-------------------------------------------|----------|----------|
| Skull length (Pmx-Q)                      | 23.1     | 25.9     |
| Skull maximum height                      | 8.1      | 8.0      |
| Premaxilla body length                    | 2.7      | 3.0      |
| Premaxilla body height                    | 2.2      | 2.2      |
| Maxilla maximum length                    | 8.2      | 7.8      |
| Maxilla maximum height                    | 5.6      | 6.4      |
| Antorbital fenestra length                | 5.7      | 4.5      |
| Antorbital fenestra height                | 3.8      | 3.7      |
| Nasal length                              | 10.4     | -        |
| Lacrimal length                           | 3.2      | 2.7*     |
| Lacrimal height (exposed in lateral view) | 3.9      | 2.6*     |
| Jugal length                              | 5.2      | 5.0*     |
| Jugal height                              | 5.8      | 4.9      |
| Prefrontal length                         | 1.7      | *        |
| Prefrontal width                          | 0.3      | *        |
| Prefrontal height                         | 1.4      | *        |
| Orbit length                              | 3.8      | 2.4      |
| Orbit height                              | 4.1      | 2.5*     |
| Frontal length                            | 4.8      | 5.1      |
| Postorbital length                        | 3.2      | *        |
| Postorbital height                        | 3.9      | *        |
| Squamosal length                          | 3.7      | 4.2*     |
| Squamosal height                          | 5.6      | *        |
| Infratemporal fenestra length             | 4.9      | 2.6*     |
| Infratemporal fenestra height             | 6.2      | 4.4*     |
| Supratemporal fenestra length             | 1.8      | *        |
| Supratemporal fenestra width              | 1.4      | *        |
| Quadratojugal height (laterally exposed)  | 4.4      | 4.2*     |
| Quadratojugal length at ventral margin    | 7.5      | 5*       |
| Quadrate height                           | 6.8      | 6.1*     |
| Parietal length                           | 5.0      | 4.7*     |
| Parietals maximum width                   | 4.1      | 5.3*     |
| Parietals minimum width                   | 1.5      | 1.8*     |
| Supraoccipital height                     | 1.2*     | *        |
| Supraoccipital width                      | 4.4      | 3.9*     |
| Vomer length                              | 3.5      | *        |
| Palatine length                           | 3.2      | *        |
| Palatine width                            | 1.8      | *        |
| Pterygoid length                          | 10.4     | *        |
| Pterygoid width                           | 2.5      | *        |
| Ectopterygoid length                      | 3.4*     | *        |
| Ectopterygoid width                       | 1.2*     | *        |
| Foramen magnum height                     | 0.7      | *        |
| Foramen magnum width                      | 1.2      | *        |
| Occipital condyle height                  | 1.5      | 2.0      |
| Occipital condyle width                   | 1.7      | 2.0      |
| Basal tubera height                       | 2.5      | 2.7      |

(Continued)

Table 2. (Continued)

|                                     | PVL 3827 | PVL 3828 |
|-------------------------------------|----------|----------|
| Basal tubera width at base          | 3.2      | -        |
| Lower jaw length                    | 20.3     | 20.1     |
| Dentary length                      | 13.4     | 13.9*    |
| Dentary anterior height             | 3.0      | 3.3      |
| Dentary maximum height              | 4.7      | 3.7*     |
| Splenial length                     | 14.5*    | *        |
| Splenial height                     | 4.6      | *        |
| Surangular height                   | 1.3      | *        |
| Surangular length                   | 9.0      | *        |
| Angular length                      | 7.1*     | *        |
| Angular height                      | 1.1      | *        |
| External mandibular fenestra length | 5.1      | *        |
| External mandibular fenestra height | 1.2      | *        |

\* indicates broken or damaged.

doi:10.1371/journal.pone.0148575.t002

process of the maxilla tapers posteriorly towards its articulation with the anterior process of the jugal. It differs from loricatans (sensu Nesbitt 2011 [1]) such as *Postosuchus kirkpatricki* [30], *Batrachotomus kupferzellensis* (SMNS 52970), and *Saurosuchus galilei* (PVSJ 32) in which the posterior process of the maxilla keeps the same dorsoventral height as the anterior portion of this process, and from aetosaurs in which the posterior process expands dorsoventrally towards its posterior end [1]. Moreover, unlike the condition in most archosaurs, the maxilla does not articulate ventral to the jugal but it apparently overlaps the jugal laterally.

All teeth on the maxillae, as well as the premaxillae, of the holotype of *Riojasuchus tenuisiceps* (PVL 3827, Fig 2A) have been damaged during their original preparation and they do not preserve their actual shape; but the referred skull material (PVL 3828, Fig 2C), which we have recently reprepared, has its teeth very well preserved and allow us to provide a detailed description of them. Each maxilla has seven teeth that are laterally compressed and curved posteriorly; both mesial and distal margins are serrated with approximately three denticles per millimeter (Fig 4A). All the maxillary teeth of *Riojasuchus tenuisiceps* are even in size and there is no clear evidence of interdental plates between on their medial side (PVL 3827). The CT scan of the holotype allowed us to identify a replacement tooth erupting on the second alveolus of the left maxilla (Fig 4F and 4H: Mrt).

The nasal is a slender and anteroventrally oriented element that, in lateral view, bifurcates anteriorly towards its contact with the premaxilla (Figs 2 and 3A:N). Its anterior half is laterally compressed, its posterior half is dorsoventrally depressed and its dorsal surface is flat with no ornamentation (PVL 3827, 3828). The anterior process of the nasal is anteroposteriorly oriented and extends beyond the anterior margin of the maxilla; this process delimits the posterior two-thirds of the dorsal margin of the external naris, and reaches the nasal process of the premaxilla anteriorly at a V-shaped contact. The ventral process of the nasal is anteroventrally directed; it delimits the posterior margin of the external naris, reaching the maxillary process of the premaxilla as in most archosaurs except for stagonolepidid aetosaurs (sensu Desojo et al 2013 [89]), where these two processes do not contact. In *Riojasuchus tenuisiceps* (PVL 3827) the ventral ramus of the nasal widens anteriorly unlike most archosaurs, and apparently overlaps the maxillary process of the premaxilla lateroventrally, although this area is slightly damaged; it also contacts the maxilla posteriorly at a straight contact. The posterior process of the nasal

reaches the frontal posteriorly by a slightly interdigitated suture, and the lachrymal posterolaterally. It has no lateral process to envelope the lachrymal as seen in eusaurischian dinosaurs and *Eoraptor lunensis* ([1]: ch. 36).

The **lacrima** is an L-shaped element that delimits the posterodorsal margin of the antorbital fenestra and fossa, and the entire anteroventral margin of the orbit (Figs 2 and 3A). The anterior ramus of the lacrima of *Riojasuchus tenuisiceps* (PVL 3827) is anteroventrally oriented and laterally overlaps the ascending process of the maxilla; it is dorsoventrally high and laterally compressed. The ventral ramus of the lacrima is posteroventrally directed and laterally overlaps the preorbital process of the jugal. It is almost as high as the orbit and meets the jugal slightly above the ventral margin of the orbit, unlike the condition of sauropodomorphs and theropods in which the lacrima meets the jugal at the ventral margin of the orbit [1]. The anterior margin of the ventral ramus is expanded anterolaterally, forming a sharp ridge that delimits the posterior margin of the antorbital fossa. This ridge also forms a deep pocket on the anterodorsal end of the fossa (Fig 2:La.p), slightly obscured in lateral view and resembling the condition of theropods and basal saurischians [1:ch. 38]. The morphology differs from pseudosuchians because these do not have a pocket on the lacrima, although some have a shallow depression on the lateral surface (e.g. *Batrachotomus kupferzellensis*: SMNS 52970, *Aetosaurus ferratus*: SMNS 5770 S16, *Neoaetosauroides engaeus*: PVL 5698).

The **prefrontal** is a laterally compressed element that expands dorsoventrally doubling its height towards its anterior end (Fig 2A and 2B:Prf); it contributes to the anterodorsal margin of the orbit. Because of its lateral compression, the prefrontal is mainly exposed laterally, unlike the condition in most pseudosuchians, in which it is well exposed dorsally as well (e.g. *Ornithosuchus longidens*: NHMUK PV R 3562; *Saurosuchus galilei*: PVSJ 32; *Gracilisuchus stipanicorum*: PVL 4612). The prefrontal overlaps both the frontal medially and the lachrymal anteriorly, but unlike the morphology in most archosauriforms, the prefrontal does not contact the nasal (Fig 3A:Prf, N). This last feature is only seen in the ornithosuchids *Riojasuchus tenuisiceps* (PVL 3827) and *Ornithosuchus longidens* (NHMUK PV R 3562), for in most archosauriforms the nasal and prefrontal contact each other and separate the frontal from the lachrymal [5]. The prefrontal of *Riojasuchus tenuisiceps* is smooth on its lateral surface; it has no ventromedial process as that mentioned by Gower and Walker [90] for aetosaurs and crocodylomorphs, and does not contact the palate as that seen in the crocodylomorphs *Dibothrosuchus elaphros* [71], and *Caiman yacare* (MACN-HE 43694). There is no evidence of palpebral bones or areas for articulation with them as those seen on loricatans [91].

The **frontal** of *Riojasuchus tenuisiceps* extends along the skull roof from the anterior border of the orbit to the posterior of the same, delimiting the middle region of the dorsal margin of this opening. The frontal is a dorsoventrally depressed and flat bone. It is rectangular in dorsal view, two times longer than wide (Fig 3A:Fr; Table 2), although it has a slight constriction on its lateral margin where the orbit is located. The frontal contacts its counterpart medially but does not form a longitudinal ridge along the midline as seen in the crocodylomorphs *Dromicosuchus grillator* [68], *Hesperosuchus agilis* [69], *Sphenosuchus acutus* [70], and *Dibothrosuchus elaphros* [71], and the loricatans *Batrachotomus kupferzellensis* (SMNS 80260) and *Postosuchus kirkpatricki* [67]. The frontal of *Riojasuchus tenuisiceps* contacts the nasal anteriorly at a slightly interdigitated transverse suture, the lachrymal and prefrontal overlap the frontal laterally, the postorbital posterolaterally and the parietal posteriorly. The last two elements contact the frontal by tightly interdigitated sutures. The frontal has the same mediolateral width from its anterior to posterior end, and its external surface is smooth, without ornamentation.

The **postfrontal** is present in *Riojasuchus tenuisiceps* (PVL 3827, 3828), unlike dinosaurs, crocodylomorphs, and the poposauroids *Effigia okeeffeae* and *Shuvosaurus inexpectatus* in which lack this element [5, 56, 92]. The postfrontal of *Riojasuchus tenuisiceps* is a triangular

element in dorsal view that contributes to the delimitation of a small area at the posterodorsal margin of the orbit (Fig 3A:Pof). It contacts the frontal anteromedially and the parietal posteromedially both at tight interdigitated sutures, and the postorbital posterolaterally at a V-shaped suture. It resembles the condition of the basal suchians *Aetosaurus ferratus* (SMNS 5770), *Gracilisuchus stipanicorum* (PULR 08, PVL 4612) in its triangular shape and dorsal position but differs from the loricatans *Saurosuchus galilei* (PVSJ 32) and *Batrachotomus kupferzellensis* (SMNS 80260) in which the postfrontal is more rectangular and located ventral to the frontal, barely exposed dorsally as a thin strip.

The **postorbital** of *Riojasuchus tenuisiceps* is a triradiate element, which can be divided into anterior, ventral, and posterior processes. The anterior process is anteromedially projected; it contacts the postfrontal anterodorsally at a V-shaped suture, and delimits the anterolateral margin of the supratemporal fenestra (Figs 2 and 3A:STF). The ventral process of the postorbital of *Riojasuchus tenuisiceps* (PVL 3827, 3828) is posterodorsally oriented at about 65° from the horizontal (Fig 2:Po), which is a slightly more vertical orientation than that seen in pseudosuchians such as *Ornithosuchus longidens* (NHMUK PV R 2409: 55°) and *Aetosaurus ferratus* (SMNS 5770: 55°) even more vertical than that of *Gracilisuchus stipanicorum* (PULR 08: 50°) and *Saurosuchus galilei* (PVSJ 32: 40°). This process tapers and overlaps the jugal anterolaterally and delimits most of the posterior margin of the orbit and the anterior margin of the dorsal half of the infratemporal fenestra. The posterior process of the postorbital extends posteriorly to contact the squamosal at a V-shaped suture; it delimits the dorsal margin of the infratemporal fenestra and the lateral margin of the supratemporal fenestra (Fig 2:ITF, STF). The supratemporal fenestrae of *Riojasuchus tenuisiceps* (PVL 3827, 3828) face dorsally and are reduced to about one quarter of the infratemporal fenestra and one third of the orbit.

The **parietal** of *Riojasuchus tenuisiceps* (PVL 3827) is not fused to its counterpart, as is the case of most archosauriforms except for crocodylomorphs (where both parietals are completely fused to each other). In *Riojasuchus tenuisiceps*, the parietals are not ornamented and rectangular, being anteroposteriorly elongated and barely longer than the frontals (Fig 3A:Pa; Table 2). Each parietal bears a divergent posterolateral process on its posterior end that gives a V-shape to the occipital margin, resembling the condition of most archosauriforms, but differing from crocodylomorphs (e.g. *Sphenosuchus acutus* [70], *Dibothrosuchus elaphros* [71], *Protosuchus haughtoni* [73], and *Caiman yacare*: MACN-HE 43694), where the occipital margin of the parietals is straight. The parietal is sutured anteriorly by a tight interdigitation with the frontal and postfrontal; it contacts the postorbital and the squamosal laterally; it is tightly sutured to the supraoccipital posteromedially and reaches the paroccipital processes of the opisthotics posteriorly. There is a noticeable change of slope at the midpoint of the parietals of *Riojasuchus tenuisiceps* (PVL 3827, 3828) with the anterior half of the parietal anteroventrally oriented and the posterior half posteroventrally oriented (Fig 2B:Pa). The posterolateral process of the parietal of *Riojasuchus tenuisiceps* slopes posteroventrally nearly at 45 degrees as seen only in *Ornithosuchus longidens* (NHMUK PV R 2409) and aetosaurs (e.g. *Neoaetosauroides engaeus*: PVL 5698), and differing from a more vertical condition seen in most archosaurs [1, 5]. The parietal delimits the medial margin of the supratemporal fenestra, the anterior margin of the posttemporal fenestra, and it does not form a supratemporal fossa as is the condition of most basal archosauriforms.

The **jugal** of *Riojasuchus tenuisiceps* has a distinctive shape not seen in other archosaurs, except for *Venaticosuchus rusconii*; it is a triradiate element but its ascending process bifurcates dorsally. The jugal delimits the antorbital fenestra posteriorly, the orbit ventrally, and the infratemporal fenestra anteroventrally (Fig 2A–2C:J). As mentioned, the jugal of *Riojasuchus tenuisiceps* participates in the margin of the antorbital fenestra, a condition seen also in the archosauriform *Proterosuchus fergusi* [26], phytosaurs, and some proterochampsids



(*Chanaresuchus bonapartei*: PVL 4575, 4586; *Gualosuchus reigi*: PVL 4576), the pseudosuchians *Ornithosuchus longidens* (NHMUK PV R 2409, 3142), *Venaticosuchus rusconii* (PVL 2578), and *Gracilisuchus stipanicorum* (PVL 4598), sauropodomorphs and ornithischians. This differentiates *Riojasuchus tenuisiceps* from crocodylomorphs, *Revueltosaurus callenderi*, some aetosaurs and loricatans, and theropods in which the jugal is excluded from the margin of this fenestra by either the lachrymal or the maxilla [1]. The jugal of *Riojasuchus tenuisiceps* (PVL 3827) also forms the posteroventral region of the antorbital fossa as seen in *Venaticosuchus rusconii* (PVL 2578) and *Ornithosuchus longidens* (NHMUK PV R 3142), but differing from the condition in most pseudosuchians (e.g. *Neoaetosauroides engaeus*: PVL 5698; *Batrachotomus kupferzellensis*: SMNS 52970; *Saurosuchus galilei*: PVL 2062; *Sphenosuchus acutus*: [70]) and avemetatarsalians (e.g. *Heterodontosaurus tucki*: [86]; *Herrerasaurus ischigualastensis*: [93])

The anterior process of the jugal is short; anteroposteriorly directed and has a slightly wavy sutural line with the posterior process of the maxilla, where the jugal slightly widens dorsoventrally. The ascending process has a wide vertical bony strut that separates the antorbital fenestra from the infratemporal fenestra [4] (Fig 2B:J.vp); this is an unusual condition because in most archosauriforms the ascending process is slender, posterodorsally directed and separates the orbit from the infratemporal fenestra (e.g., *Chanaresuchus bonapartei*: PVL 4575, 4586; *Ornithosuchus longidens*: NHMUK PV R 2409; *Gracilisuchus stipanicorum*: PVL 4612; *Neoaetosauroides engaeus*: PVL 4363; *Batrachotomus kupferzellensis*: SMNS 52970; *Protosuchus haughtoni*: [73]). This vertical strut elevates the orbit and bifurcates dorsally into a preorbital ramus and a postorbital ramus, both of which taper dorsally. This gives the orbit a distinctive V-shaped ventral margin (PVL 3827, 3828) [1] (Fig 2:J). The posterior process of the jugal is three times longer than the anterior process and it is anteroposteriorly oriented. It dorsally overlaps the anterior process of the quadratojugal as in the basal archosauriforms *Erythrosuchus africanus* [28], *Euparkeria capensis* [36], *Chanaresuchus bonapartei* (PVL 4575, 4586), the poposaurids *Quianosuchus mixtus* [51] and *Arizonasaurus babbitti* [52], and the loricatans *Batrachotomus kupferzellensis* (SMNS 52970) and *Prestosuchus chiniquensis* (UFRGS-PV 156 T). The jugal of *Riojasuchus tenuisiceps* (PVL 3827, 3828) has an anteroposteriorly short lateral protuberance on the ventral margin of its central region (Fig 2B:J.pb). It differs from the ridge seen on the lateral surface of the jugal of *Ornithosuchus longidens* (NHMUK PV R 3142) but slightly resembles the protuberance seen in *Garjainia madiba* [29], although it is not so expanded laterally.

The **quadratojugal** is an L-shaped element that delimits a portion of the posterior margin of the infratemporal fenestra (less than 80% of its posterior margin as most archosaurs except for some aetosaurs, “rauisuchids” and crocodylomorphs) and the lateral margin of the quadrate foramen. The anterior process of the quadratojugal of *Riojasuchus tenuisiceps* is anteroposteriorly directed and laterally overlapped by the jugal; the dorsal process of the quadratojugal is anterodorsally oriented, dorsally overlapped by the squamosal, and contacts the quadrate medially all along its medial margin (Fig 2B:Qj). The anterodorsal direction of this dorsal process gives this fenestra a distinctive L-shape otherwise seen only in *Ornithosuchus longidens* (Fig 2B:ITF). The quadratojugal of *Riojasuchus tenuisiceps* (PVL 3827) resembles that of some proterochampsids such as *Chanaresuchus bonapartei* (PVL 4586) and *Gualosuchus reigi* (PULR 05) because of the presence of a concavity on its anterior margin. Nonetheless, it differs from the later because, as in most archosauriforms, it has a smooth lateral surface without a temporal fossa and therefore without a ridge delimiting it, as seen in *Chanaresuchus bonapartei* (PVL 4586) and *Tropidosuchus romeri* (PVL 4606). The quadratojugal of *Riojasuchus tenuisiceps* also delimits the lateral margin of the quadrate foramen (Fig 5:Q.f).

The **squamosal** is a tetraradiate element that can be divided into anterior, ventral, posterior and medial processes. The anterior process is very short and articulates with the posterior process of the postorbital, separating the supratemporal from the infratemporal fenestra (Figs 2 and 3:Po, STF, ITF). The ventral process of the squamosal is ventrally directed unlike that of aetosaurs which has a marked anteroventral orientation. This ventral process in *Riojasuchus tenuisiceps* reaches the quadratojugal ventrally and gives the infratemporal fenestra a distinctive L-shape, also seen in *Ornithosuchus longidens* (NHMUK PV R 2409). This process has a great participation on the margin of the infratemporal fenestra, delimiting almost half of its posterior margin (Fig 2:ITF); this condition resembles that of most archosaurs excepting aetosaurs in which the squamosal barely participates on the margin of this fenestra (e.g. *Neoaetosauroides engaeus*: PVL 4363) or is excluded from it by the quadratojugal and postorbital (e.g. *Aetosaurus ferratus*: SMNS 5770). The posterior process of the squamosal of *Riojasuchus tenuisiceps* is hook-like and extends posterior to the dorsal head of the quadrate resembling that of most archosauriforms, except for *Proterosuchus fergusi* [26] and *Erythrosuchus africanus* [28]. It laterally overlaps the opisthotic forming the paroccipital processes (Fig 2:Pp). The lateral surface of the squamosal of *Riojasuchus tenuisiceps* does not have any ridge like that seen on the basal loricatans *Saurosuchus galilei* (PVL 2062), *Prestosuchus chiniquensis* (UFRGS-PV 156 T), and *Batrachotomus kupferzellensis* (SMNS 52970). Furthermore, the squamosal of *Riojasuchus tenuisiceps* lack ridges delimiting a supratemporal fossa on its dorsal surface as that seen on *Postosuchus kirkpatricki* [67], *Polonosuchus sileasicus* (ZPAL Ab III 563), *Rauisuchus tiradentes* (BSPG AS XXV 62), and *Batrachotomus kupferzellensis* (SMNS 52970, 80260). The medial process of the squamosal of *Riojasuchus tenuisiceps* is not exposed on any of the skulls (PVL 3827, 3828) because they are completely articulated.

The **quadrate** is a dorsoventrally elongated bone, posteroventrally directed as in most archosaurs with the exception of aetosaurs (e.g. *Neoaetosauroides engaeus* PVL 5698), *Shuvosaurus inexpectatus*, spinosaurids and ornithomimids in which the quadrate is anteroventrally oriented (Fig 2B:Q). The quadrate of *Riojasuchus tenuisiceps* delimits the dorsal, medial, and ventral margins of the quadrate-quadratojugal foramen, which is formed in between the lateral contact of the quadrate with the quadratojugal (Fig 5:Q.f). The quadrate contacts the squamosal laterodorsally along its dorsal half, the opisthotic dorsally, and overlaps the pterygoid anteromedially. The dorsal head of the quadrate of *Riojasuchus tenuisiceps* (PVL 3827) is expanded anteromedially; it is partially exposed laterally as seen in a wide variety of dinosaurs and pseudosuchians (e.g. *Turfanosuchus dabaensis* [44], *Quianosuchus mixtus* [51], *Saurosuchus galilei*: PVSJ 32, *Aetosaurus ferratus*: SMNS 5770), excepting crocodylomorphs, where the squamosal covers the entire head of the quadrate [1]. The dorsal head of the quadrate fits into a concavity formed by the squamosal and the paroccipital process, apparently forming the synovial otic joint as is the condition in most archosaurs, excepting thyreophoran dinosaurs, which have akinetic skulls [94]. The quadrate has a dorsoventrally oriented ridge on its posterior surface (Fig 5:Q.r). Unlike *Postosuchus kirkpatricki* [67] and *Polonosuchus sileasicus* (ZPAL Ab III 563), where the ridge is ventral to the quadrate-quadratojugal foramen, in *Riojasuchus tenuisiceps* the ridge is dorsolateral to the foramen. The distal end of the quadrate is divided by a shallow groove, resulting in two small condyles. The medial condyle is rounded whereas the lateral condyle is slightly compressed anteroposteriorly. They articulate with the concave articular surfaces of the articular from the lower jaws.

**Palatal complex.** The **vomer** of *Riojasuchus tenuisiceps* is a laterally compressed and anteroposteriorly directed element that is located between the choanae, delimiting their medial margins, and forming the anterior end of the palate (Fig 3B:V). Each vomer contacts its counterpart medially, the premaxilla anteriorly, and the palatine posteriorly. There is no evidence of teeth on the ventral surface of the vomers of *Riojasuchus tenuisiceps*, unlike proterochampsians

(e.g. *Tropidosuchus romeri*: PVL 4601) and proterosuchids (e.g. *Proterosuchus fergusi* [26]), which have teeth along their vomers.

The **palatine** contacts the vomer anteriorly, the pterygoid medially and posteriorly, and the maxilla laterally. It delimits the posterior margin of the choana but has no defined fossa around the choana as is the case of most archosauriforms (Fig 3B:Pl, Ch), except for the crocodylomorphs *Sphenosuchus acutus* [70], *Dibothrosuchus elaphros* [71], and *Kayentasuchus walkeri* [72], which have a rim delimiting a fossa around the choana on the ventral surface of the palatine. The palatine of *Riojasuchus tenuisiceps* (PVL 3827) has an anterolaterally directed ridge running across its ventral surface (Fig 3B:Pl.r). It has no palatine teeth, like most archosaurs but differing from non-archosaurian archosauriforms such as *Chanaresuchus bonapartei* (PULR 07), *Tropidosuchus romeri* (PVL 4601), and *Doswellia kaltenbachi* [31].

The **pterygoid** is the largest element of the palate (Fig 3B:Pt; Table 2). It contacts the vomer anteriorly through the tip of its anteromedial process, the palatines anterolaterally, and the ectopterygoids ventrolaterally; the pterygoid overlaps the quadrate posterolaterally through the quadrate process, and reaches the basiptyergoid processes of the basisphenoid posteriorly. It only contacts the other pterygoid medially on its anterior-most end, but most of the pterygoid does not contact its counterpart, forming an interptyergoid vacuity (Fig 3B:Iptv) similar to that of *Euparkeria capensis* [36] and *Turfanosuchus dabaensis* [44]. *Riojasuchus tenuisiceps* (PVL 3827) differs from *Ornithosuchus longidens* (NHMUK PV R 2409), because on the latter the pterygoids do contact each other at the midline along their entire medial margin and therefore do not form an interptyergoid vacuity. The palatal process of the pterygoid of *Riojasuchus tenuisiceps* is smooth and has no teeth as is the case of most archosaurs. This contrasts with the condition in the gracilisuchid *Turfanosuchus dabaensis* [44] and the theropod dinosaur *Eoraptor lunensis* [84] which have pterygoid teeth, and many archosauriforms such as proterochampsids, doswellids, and proterosuchids. The palatal process delimits the palatine-ptyergoid fenestra medially and posteriorly, and the suborbital fenestra posteromedially (Fig 3B:Pl-Pt.f, Sor.f). The presence of the palatine-ptyergoid fenestra is a synapomorphy of Ornithosuchidae and therefore has only been registered in *Ornithosuchus longidens*, *Riojasuchus tenuisiceps*, and *Venaticosuchus rusconii* [4, 5]. The quadrate process of the pterygoid, which contacts both the quadrate and the basiptyergoid process, has a concave surface where the basiptyergoid process fits as a peg and socket articulation, constituting the basal cranial joint, and a posterolateral laminar projection that laterally overlaps the pterygoid process of the quadrate.

The **ectopterygoid** is a comma-shaped element that contacts the jugal ventrolaterally and the pterygoid dorsomedially (Fig 3B:Ept). The ventral disposition of the ectopterygoid of *Riojasuchus tenuisiceps* resembles that of basal archosauriforms and pseudosuchians, and differs from dinosaurs, where the ectopterygoid is located dorsal to the pterygoid. The ectopterygoid of *Riojasuchus tenuisiceps* delimits the posterior margin of the suborbital fenestra; this fenestra is equal in size to the palatine-ptyergoid fenestra (Fig 3B:Pl-Pt.f, Sor.f; Table 1), unlike that of *Ornithosuchus longidens*, in which the suborbital fenestra is about three times larger than the palatine-ptyergoid fenestra [13]. On the other hand, the suborbital fenestra of *Riojasuchus tenuisiceps* is proportionally smaller (fenestra/skull length: 1/20) than that of other archosauriforms such as *Ornithosuchus longidens* (1/11), *Neoaetosauroides engaeus* (1/7.2), *Saurosuchus galilei* (1/7.5), *Chañaresuchus bonapartei* (1/11.4).

**Braincase.** The **supraoccipital** is an element located in the posteriormost area of the skull roof, appearing subtriangular in posterodorsal view (Fig 3A:So). It forms the dorsal margin of the foramen magnum as seen in most archosauriforms (Fig 5:FM), excepting proterosuchids and erythrosuchids in which the exoccipitals exclude the supraoccipital from this foramen. The supraoccipital also delimits the medial margins of the posttemporal opening (PVL 3827; Fig 3A:PTF). In *Riojasuchus tenuisiceps*, as well as phytosaurs, aetosaurs, and the suchians

*Gracilisuchus stipanicorum* (PULR 08) and *Saurosuchus galilei* (PVSJ 32), the posttemporal opening is slightly wider than half the diameter of the foramen magnum. This is unlike that of proterochampsids and dinosaurs in which this fenestra is reduced, or crocodylomorphs in which this opening is absent. Although the sutures are difficult to trace, the supraoccipital contacts the parietal anteriorly at a tight interdigitated suture, and contacts the ophistotic posterolaterally at a straight suture. The contact with the exoccipital is unclear because of the poor preservation of that region. The external dorsal surface of the supraoccipital of *Riojasuchus tenuisiceps* is smooth. There is no evidence of any ridge at the midline for the insertion of nuchal muscles unlike the condition seen in the pseudosuchians *Neoaetosauroides engaeus* (PVL 5698), *Arizonasaurus babbitti* [53], *Saurosuchus galilei* [61], and *Batrachotomus kupferzellensis* (SMNS 80260), or anterolateral ridges as those seen in the dinosauriforms *Silesaurus opolensis* [79] and *Lewisuchus admixtus* (PULR 01).

The **ophistotic** is mediolaterally elongated; posterolaterally oriented. It forms, along with the squamosal, the paroccipital process which has a barely expanded distal end (Figs 3A and 5: Op), as seen in phytosaurs, aetosaurs (e.g. *Neoaetosauroides engaeus*: PVL 5698), *Gracilisuchus stipanicorum* (PULR 08; PVL 4612), *Batrachotomus kupferzellensis* (SMNS 80260), and *Saurosuchus galilei* [1, 61]. This contrasts with the condition of *Postosuchus kirkpatricki* [67] and some crocodylomorphs (e.g. *Sphenosuchus acutus* [70]), where the distal end of the paroccipital process expands dorsally [1]. The ophistotic of *Riojasuchus tenuisiceps* is apparently fused medially to the exoccipital (Fig 5:Op, Eo); the ventral ramus of the ophistotic extends lateral to the exoccipital area, and the sutures between these two elements cannot be seen, a condition common in most archosauriforms. The ophistotic contacts the parietal anteriorly at a straight suture, overlaps the squamosal laterally, the quadrate ventrally, the basioccipital posteromedially, and reaches the supraoccipital medially. The ophistotic of *Riojasuchus tenuisiceps* delimits the posterior margin of the post-temporal fenestra and extends laterally beyond the supratemporal fenestra. This resembles the condition of most archosaurs (Fig 3A:Op, PTF, STF), but is unlike that seen in *Gracilisuchus stipanicorum* [41] and some crocodylomorphs (e.g. *Protosuchus haughtoni* [73], *Litargosuchus leptorhynchus* [72]), in which the lateral extent of the paroccipital process is at the margin or medial to the supratemporal fenestra. The external surface of the ophistotic is smooth to slightly striated (PVL 3828) but does not form a marked subhorizontal ridge as seen in the loricateans *Batrachotomus kupferzellensis* (SMNS 80260) and *Saurosuchus galilei* (PVSJ 32).

The **exoccipital** is poorly preserved on both skulls (PVL 3827, 3828). The exoccipital-opisthotic suture line is not marked, as occurs in many basal archosauriforms [95]. Nevertheless, the exoccipital is here identified as the dorsolaterally oriented pillar that contacts the basioccipital and the ophistotic region (Fig 5:Eo). The exoccipitals of *Riojasuchus tenuisiceps* do not contribute to the occipital condyle, resembling the condition of *Euparkeria capensis* [38]. This condition differs from most archosauriforms in which the occipital condyle is composed not only of the basioccipital but also the exoccipitals (e.g. *Pseudochampsia ischigualastensis*: [96]; *Neoaetosauroides engaeus*: PVL 5698; *Saurosuchus galilei*: PVSJ 32; and *Arizonasaurus babbitti*: [53]). The exoccipitals of *Riojasuchus tenuisiceps* do not contact each other medially as seen in *Effigia okeeffeae*, *Shuvosaurus inexpectatus* and crocodylomorphs [1], but only delimit the lateral margins of the foramen magnum (Fig 5:FM). This contrasts the condition seen in most archosaurs, where the exoccipitals meet at the midline excluding the basioccipital from the foramen magnum, and therefore delimiting this opening ventrally. The exoccipitals of *Riojasuchus tenuisiceps* (PVL 3827, 3828) have no evidence of a lateral exoccipital ridge as seen in *Batrachotomus kupferzellensis* (SMNS 90042) and *Stagonolepis robertsoni* (MCZD 2–4). A possible foramen for the cranial nerve XII on the right exoccipital of the holotype of *Riojasuchus*

*tenuisiceps* is visible but should be considered carefully because of the poor preservation of this region (Fig 5:CN XII?).

The **basioccipital** forms all the occipital condyle and the posterodorsal portion of the basal tubera (Fig 5:Bo, Bt); it contacts the basisphenoid anteroventrally at a straight suture and the exoccipitals dorsolaterally. The occipital condyle is almost spherical and does not have evidence of a notochordal pit, contrasting with that seen on *Batrachotomus kupferzellensis* (SMNS 80260), *Saurosuchus galilei* (PVSJ 32), and *Doswellia kaltenbachi* [31]. The occipital condyle lies very close to the posterior side of the basal tubera and therefore the basioccipital has a poor development of the condylar neck (Fig 3B:Bo) as seen in *Batrachotomus kupferzellensis* (SMNS 80260), *Postosuchus kirkpatricki* [67], *Saurosuchus galilei* (PVSJ 32), and *Doswellia kaltenbachi* [31]. However, it does not reach the reduction seen in *Archeopelta arborensis* (CPEZ-239a), *Euparkeria capensis* (cast of SAM-PK 5867), *Proterosuchus fergusi* [26], and *Marasuchus lilloensis* [97] where the condylar neck is completely absent. The basal tubera of the basioccipital is a bilobed structure in which each lobe is separated from the other by a shallow ventromedial notch. Each lobe is located ventrolateral to the occipital condyle (Fig 5:Bt); they contact the exoccipital dorsally and the basal tubera of the parabasisphenoid anteriorly. On the posteroventral surface of the basal tubera of the basioccipital, where both lobes meet medially, the basioccipital has an anteroposteriorly compressed depression, the basioccipital recess (Fig 3B:Bo.r), resembling the condition of most archosaurs excepting the rauisuchid *Postosuchus kirkpatricki* [67] which lacks this depression. The presence of this basioccipital recess also distinguishes *Riojasuchus tenuisiceps* from proterochampsids and erythrosuchids which do not have this structure.

The **parabasisphenoid** forms the anterior part of the basal tubera and the basiptyergoid processes (Fig 3B:Bs, Bpt), and it is anteroventrally directed so that the basiptyergoid processes are located anteroventrally to the basal tubera as in most archosauriforms (e.g. *Chanaresuchus bonapartei*: PVL 4586, *Euparkeria capensis*: cast of SAM-PK 5867, *Neoaetosauroides engaeus*: PVL 5698, *Saurosuchus galilei*: PVSJ 32, *Arizonasaurus babbitti*: [52], *Silesaurus opolensis*: [79]). This configuration contrasts with that seen in *Proterosuchus fergusi*, where the basal tubera and the base of the basiptyergoid processes are at the same level. The basisphenoid recess (= median pharyngeal recess) is located on the ventromedial region of the parabasisphenoid (Fig 3B:Bs.r), between the basiptyergoid processes, and it is shallow like that seen in aetosaurs (e.g. *Neoaetosauroides engaeus*: PVL 5698, *Desmotosuchus spurensis*: cast of TTUP 9024, *Aetosaurus ferratus*: SMNS 5770) [1]. *Riojasuchus tenuisiceps* (PVL 3827, 3828) lacks an intertuberal plate between the basioccipital recess and the basisphenoid recess as in most archosauriforms (e.g. phytosaurs, aetosaurs, “rauisuchians”), excepting proterosuchids, which have this structure separating both recesses [95] (e.g. *Proterosuchus fergusi* [95], *Garjainia madiba* [29]). As in basal archosauriforms and pseudosuchians, the lateral surface of the parabasisphenoid of *Riojasuchus tenuisiceps* lacks an anterior tympanic recess (PVL 3827), that structure can be identified only in neotheropods [97] and some basal dinosauiromorphs [1].

The basiptyergoid processes of *Riojasuchus tenuisiceps* are not enlarged like that of non-crocodyliform crocodylomorphs but are of a moderate size compared to the tubera, as is the condition of most archosauriforms (Fig 3B:Bpt). The basiptyergoid processes are posteriorly oriented and diamond-shaped, with a marked notch that separates them from the basal tubera, and contact the pterygoid at an apparently non-sutural articulation. They resemble those seen in *Postosuchus kirkpatricki* [67], *Batrachotomus kupferzellensis* [62], *Saurosuchus galilei* (PVSJ 32), *Sphenosuchus acutus* [70], aetosaurs and phytosaurs, but differ from those of *Chanaresuchus bonapartei* (PULR 07), *Effigia okeeffeae* [56], *Shuvosaurus inexpectatus* [1], *Silesaurus opolensis* [79], and *Marasuchus lilloensis* [76] in which these processes face more anteriorly [1]. The cultriform process is difficult to identify, but extends anteriorly between the dorsomedial

margins of the pterygoids. The foramina for the exit of the internal carotids cannot be recognized on PVL 3827 or PVL 3828. Nonetheless, we can eliminate the possibility that these openings are located on the ventral surface of the parabasisphenoid, for that area is well preserved and there is no evidence of these foramina there (Fig 3B:Bs).

The **prootic** and **laterosphenoid** cannot be clearly recognized on the holotype (PVL 3827) because of the poor preparation of that region, but they are exposed on the specimen PVL 3828, which we have recently reprepared. Nevertheless, they are poorly preserved and damaged by the crushing of the skull roof. These elements form the lateral wall of the braincase, with the laterosphenoid contacting the frontal dorsally and the prootic posteriorly (Fig 2B:Pr, Ls). On the middle region of the lateral side of the braincase of PVL 3828 there is a round pit that could correspond to the foramen for the trigeminal nerve (cranial nerve V), which would also indicate the prootic-laterosphenoid suture (Fig 2B:CN V).

**Lower jaw.** The **dentary** of *Riojasuchus tenuisiceps* is anteroposteriorly elongated, dorsoventrally low, and it bifurcates posteriorly, occupying more than half the length of the lower jaw (Fig 6:De; Table 2). The anterior end of the dentary contacts its counterpart medially along a class I mandibular symphysis (flat, smooth and equally high as deep surface [98]); this area is ventrally expanded compared to the rest of the dentary. The anterior end of the dentary is rounded as in most archosauriforms, unlike that of aetosaurs (e.g. *Neoaetosauroides engaeus*: PVL 3525, *Aetosaurus ferratus*: SMNS 5770) and some silesaurid dinosauriforms (e.g. *Silesaurus opolensis*, *Sacisaurus agudoensis*) [1], in which the dentary is pointed. The lateral surface of the dentary is smooth and no foramina can be recognized either on PVL 3827 or PVL 3828. The dorsal surangular process contacts the surangular but the type of contact is unclear because of the poor preservation of this region; the dorsal surangular process of the dentary delimits the anterodorsal margin of the external mandibular fenestra (Fig 6A and 6B: EMF). The ventral angular process of the dentary tapers posteriorly, overlaps the angular, and delimits the anteroventral margin of the external mandibular fenestra. The dentary has nine teeth along its dorsal margin, but no interdental plates can be recognized. The first tooth is broken but small in section (Fig 4B), whereas the second and third teeth are hypertrophied, being three times larger than the posterior ones, slightly curved posteriorly, and have no serrations preserved on their margins, probably because of preparation (PVL 3827, 3828). These teeth are located on the anterior region of the dentary and, when the mandibles occlude, they fit in the edentulous diastema of the premaxilla. CT scan images allowed us to see the long posteroventrally curved roots of this hypertrophied teeth, which are twice as tall as the crown, and a replacement tooth on the third alveolus of the dentary (Fig 4E and 4G:Al, Drt). The posterior teeth are much smaller and some of them are barely curved posteriorly. One tooth from the posterior region of the dentary was exposed while reparing the lower jaws of PVL 3828, and it has serrations on the distal margin (Fig 4C). The posterior teeth of the holotype (PVL 3827), which have been overprepared and lost all trace of the presence of denticles. Contra Baczkó et al. 2014 [4], the dental configuration in *Riojasuchus tenuisiceps* (PVL 3827, 3828) resembles that of *Ornithosuchus longidens* (NHMUK PV R 3143), and differs from *Venaticosuchus rusconii* (PVL 2578), in having a first small tooth before the hypertrophied caniniform teeth on the anterior region of the dentary.

The **splénial** of *Riojasuchus tenuisiceps* covers the Meckelian groove medially for there is no visible exit on either preserved hemimandible of PVL 3827, which are disarticulated and have their symphyseal articular surfaces exposed (Fig 6C and 6D:Sp). The anterior end of the splénial of *Riojasuchus tenuisiceps* (PVL 3827) reaches the level of the third dentary teeth. Because of the anteroposteriorly expanded symphysis of the mandibles the splénial has an important participation in this suture as also seen in phytosaurs [5] and the pseudosuchians *Ornithosuchus longidens*, *Shuvosaurus inexpectatus*, and *Effigia okeeffeae* [56]. *Riojasuchus tenuisiceps*

(PVL 3827, 3828) has no mylohyoid foramen on the ventral surface of the splenial as is the condition for all pseudosuchians; the mylohyoid foramen has only been recognized in saurischian dinosaurs [1].

The **surangular** is an anteroposteriorly directed and elongated element; it forms the dorsal margin of the posterior half of the mandible, and delimits the posterodorsal margin of the external and internal mandibular fenestrae (Fig 6:Sa, EMF, IMF). The surangular has a very well developed surangular shelf on its dorsal margin (Fig 6B:Sa.sh), sharper than that seen in *Ornithosuchus longidens* (NHMUK PV R 2409) and *Gracilisuchus stipanicorum* (PVL 4597). A deep, rounded foramen can be clearly recognized close to the posterior end of the surangular (Fig 6B:Sa.f). The surangular foramen in *Riojasuchus tenuisiceps* is small, like that of most archosauriforms (e.g. *Chanaresuchus bonapartei*: PVL 4676, *Euparkeria capensis*: cast of SAM-PK 5867, *Ornithosuchus longidens*: NHMUK PV R 3142, *Aetosaurus ferratus*: SMNS 5770), differing from the poposaurioids *Effigia okeeffeae* and *Shuvosaurus inexpectatus* [56] in which the surangular foramen is expanded, and also from crocodylomorphs (e.g. *Sphenosuchus acutus* [70], *Dibothrosuchus elaphros* [71]) in which the surangular foramen is completely absent (e.g. *Caiman yacare*: MACN-HE 43694).

The **angular** of *Riojasuchus tenuisiceps* is a laterally compressed and slender element that delimits the ventral margin of the external mandibular fenestra (Fig 6:An, EMF). The angular (PVL 3827; Fig 6) forms the complete ventral margin of the external mandibular fenestra as seen in the archosauriforms *Proterosuchus fergusi* [25] and *Erythrosuchus africanus* [28], phytosaurs, the ornithosuchid *Venaticosuchus rusconii* (PVL 2578), gracilisuchids, and the shuvosaurid *Effigia okeeffeae* [56]. This condition differs from that of proterochampsids, *Euparkeria capensis* (cast of SAM-PK 5867), most aetosaurs (excepting *Aetosaurus ferratus*: SMNS 5770), and loricatans in which the angular delimits the posterior three quarters of the external mandibular fenestra. The angular of *Riojasuchus tenuisiceps* tapers anteriorly, contacting the dentary at an oblique suture. The angular also overlaps the prearticular medially, reaches the surangular dorsally, and contacts the articular posteriorly at a straight contact. The angular is mainly exposed in lateral view but also reaches the ventral margin of the hemimandible in *Riojasuchus tenuisiceps* (PVL 3827, 3828) (Fig 6D:Sa); this resembles the condition in other pseudosuchians such as the aetosaur *Neoaetosauroides engaeus* (PVL 4363) and the loricatan *Batrachotomus kupferzellensis* (SMNS 80260). The external surface of the angular is convex and smooth unlike the rugose surface seen in the pseudosuchians *Ornithosuchus longidens* [13] and *Postosuchus kirkpatricki* [67].

The **prearticular** of *Riojasuchus tenuisiceps* forms the posteroventral margin of the lower jaw and delimits the ventral margin of the internal mandibular fenestra (Fig 6D:Pra, IMF). The prearticular (PVL 3827) is exposed medially and ventrally, unlike that of the aetosaur *Neoaetosauroides engaeus* (PVL 4363), and the loricatans *Batrachotomus kupferzellensis* (SMNS 80260) and *Postosuchus kirkpatricki* [67], where the element is only exposed medially and its ventral surface is covered by the angular. The prearticular of *Riojasuchus tenuisiceps* is slender and anteroposteriorly elongated; its anterior region curves anterodorsally and its posterior region bifurcates posteriorly into a posterior process and a medial one. The anterior projection of the prearticular is medially overlapped by the splenial and ventrolaterally overlapped by the angular. The posterior half of the prearticular of *Riojasuchus tenuisiceps* (PVL 3827, 3828) is low and curves anterodorsally but it does not expand dorsoventrally, contrasting with the fan-shaped portion seen in the loricatans *Batrachotomus kupferzellensis* (SMNS 80260), *Postosuchus kirkpatricki* [67], and *Rauisuchus tiradentes* (BSPG AS XXV 68). The posterior process of the prearticular of *Riojasuchus tenuisiceps* covers the surangular laterally and the articular posterodorsally, and the medial projection of the prearticular contacts the articular on its posterodorsal end.

The **articular** is triangular in dorsal view, with a glenoid fossa that bears two cotyles separated by a delicate transverse rim where the distal condyles of the quadrate articulate. The medial cotylus is larger than the lateral (PVL 3827) (Fig 6D:Ar, Gl). The glenoid fossa of *Riojasuchus tenuisiceps* is located at the level of the dorsal margin of the mandible, unlike the condition in basal archosauriforms, aetosaurs, ornithischians and sauropodomorphs, in which the glenoid is at a lower level below the dorsal margin of the mandible [1]. The articular is overlapped by the surangular anterolaterally and the prearticular anteromedially and ventrally. On its posterior end, the articular of *Riojasuchus tenuisiceps* has a retroarticular process that is 1.5 times the anteroposterior length of the glenoid fossa (PVL 3827) (Fig 6:Ar,rp). As seen in most archosauriforms, the articular of *Riojasuchus tenuisiceps* is concave posterior to the glenoid fossa and lacks any dorsomedial projection in that area differing from the condition in lorica-tans (e.g. *Postosuchus kirkpatricki* [67], *Batrachotomus kupferzellensis*: SMNS 80260, *Fasolasuchus tenax*: PVL 3850), the aetosaurs *Stagonolepis robertsoni* and *Longosuchus meadei* [47], and basal crocodylomorphs (e.g. *Hesperosuchus agilis* [69], *Dromicosuchus grillator* [68], *Protosuchus haughtoni* [73]), which have a dorsomedial projection. Moreover, the ventromedial process (sensu Nesbitt 2011 [1]) of the articular seen in various phytosaurs and paracrocodylomorphs (e.g. *Postosuchus kirkpatricki* [67], *Batrachotomus kupferzellensis*: SMNS 80260, *Fasolasuchus tenax*: PVL 3850, *Hesperosuchus agilis* [69], *Sphenosuchus acutus* [70]) is absent in *Riojasuchus tenuisiceps* (PVL 3827, 3828), as is also the case in basal archosauriforms. *Riojasuchus tenuisiceps* (PVL 3827, 3828) lacks a foramen on the medial side of the articular, contrasting with the condition in paracrocodylomorphs, aetosaurs, and *Euparkeria capensis* [36]. This probably results from the absence of the ventromedial process on the articular, which is the structure through which that foramen passes in archosaurs.

**Cranial endocast.** The endocranial cavity of *Riojasuchus tenuisiceps* was studied based on the holotype specimen only because the referred specimen has its skull roof completely collapsed and is thus impossible to study that area by direct observation or CT scan images. The endocranial cavity of PVL 3827 is filled with a red, fine grained sandstone matrix that was not removed during its preparation, and therefore, the endocast of *Riojasuchus tenuisiceps* was studied using a digital 3D model developed utilizing a CT scan of the skull (Fig 7).

In this digital endocast of *Riojasuchus tenuisiceps*, the cerebral hemispheres are laterally expanded (Fig 7:Ceh), they are slightly longer than wide as in the aetosaurs *Neoaetosauroides engaeus* (PVL 5698; PULR 108) and *Aetosaurus ferratus* (SMNS 5775). On the other hand, the condition of *Riojasuchus tenuisiceps* is different from that of the aetosaur *Desmotosuchus spurensis* [99] and the theropod *Sinraptor dongi* [19] whose cerebrum is approximately equally long as wide, or that of the extant *Alligator mississippiensis* (OUVC 9761) and the sauropod *Amargasaurus cazuai* [20] which is 1.2 to 2 times wider than long, respectively.

The width of the anterior brain of *Riojasuchus tenuisiceps* almost triples from its anterior edge to the maximum width of the cerebral hemispheres, widening abruptly on the middle region of the hemispheres. This condition resembles that of *Alligator mississippiensis* (OUVC 9761), but contrasts with that of the aetosaurs *Neoaetosauroides engaeus* (PULR 108), in which the maximum width of the anterior brain only doubles from its anterior width, and *Desmotosuchus spurensis* [99], whose telencephalon slightly narrows posteriorly. The angle between the anterior and midbrain is approximately 130° (Fig 7), which does not differ much from that seen in the aetosaurs *Neoaetosauroides engaeus* (PULR 108) and *Desmotosuchus spurensis* [99] (ranging from 125° to 140°), the crocodile *Alligator mississippiensis* (140°) [100], the theropod dinosaur *Sinraptor dongi* [19], or the sauropod dinosaur *Amargasaurus cazuai* (140°) [20]. On the endocast of *Riojasuchus tenuisiceps*, we identified the exit for the olfactory nerves (cranial nerves I) on the anterior end of the anterior brain, the trigeminal nerve (CN V) exiting laterally through a single foramen, the hypophysis on the ventral region of the anterior brain, and the



base of the internal carotids arteries exiting from the ventral edge of the hypophysis (Fig 7; Olf, CN V, Hy, Inc). CN I seems to be short compared to that seen in theropod dinosaurs [101], but not as short as that of sauropod dinosaur [101]. The exit of the CN V through a single foramen suggests that the ophthalmic ( $V_1$ ), maxilar ( $V_2$ ), and mandibular ( $V_3$ ) branches of this nerve diverge once outside the braincase, resembling that of aetosaurs, many modern crocodiles and sauropod dinosaurs. It differs from that of some theropod dinosaur in which the branch  $V_1$  exits through a different foramen than  $V_{2,3}$  [101] and some fossil crocodiles (e.i. *Mourasuchus nativus*) in which the branch  $V_2$  exits through a different foramen than the  $V_3$  [102].

## Discussion and Conclusion

Ornithosuchids have been an enigmatic group of Triassic archosaurs with bizarre anatomical features and poorly known diversity. Their phylogenetic relationships have been quite controversial and debated for decades, but most recent studies regard them as basal pseudosuchians [1, 2, 4, 15, 103]. A better understanding of the anatomy of *Riojasuchus tenuisiceps*, one of the most completely preserved species of this clade, will shed light on the interrelationships of Ornithosuchidae as well as their phylogenetic relationship within Archosauria.

In this contribution we reexamined the skull of the holotype and referred material of *Riojasuchus tenuisiceps* and presented a detailed redescription of its cranial anatomy, which was previously studied by Bonaparte over 40 years ago [6, 17]. The skull of *Riojasuchus tenuisiceps* has a very distinctive combination of features that distinguishes it from other archosaurs such as a diastema between the premaxilla and maxilla, the absence of a nasal-prefrontal contact, a jugal with a Y-shaped ascending process separating the antorbital fenestra from the infratemporal fenestra, the jugal participating in the antorbital fossa; the presence of palatine-pterygoid fenestrae, and a small tooth anterior to the two hypertrophied teeth on the dentary, among others. We recognized two synovial joints (basal and otic) but found no evidence of attachment of protractor musculature (e.g. preotic pendant) on the skull of *Riojasuchus tenuisiceps* which, following the criteria of Holliday and Witmer [94], allowed us to infer a partially kinetically competence of the skull. This condition resembles that of non-avian saurischian dinosaurs, but differs from the kinetic avian dinosaurs and the akinetic modern crocodylians [94]. Trotteyn et al. [104] proposed that the pseudosuchians *Neoaetosauroides engaeus* and *Saurosuchus galilei* also have partially kinetic competent skulls, which would support the condition here interpreted for *Riojasuchus tenuisiceps*. We also identified at least two autapomorphies on the skull of *Riojasuchus tenuisiceps*, consisting of a suborbital fenestra equal in size to the palatine-pterygoid fenestra and a deep antorbital fossa that reaches the ventral margin of the maxilla.

Moreover, we made the first description of a digital endocast of *Riojasuchus tenuisiceps*, which, although brief, will provide useful information for future studies on the subject contributing to the poor knowledge of palaeoneuroanatomy of pseudosuchians. The general shape of the encephalon of *Riojasuchus tenuisiceps* does not differ much from that of the known pseudosuchians and theropods but it is more elongated than that of sauropod dinosaurs. The distribution of the recognized cranial nerves is consistent with that seen in other pseudosuchians, differing from theropod dinosaurs in some structures as the extension of the CN I and the branching of the CN V.

The revision of the phylogenetic affinities of *Riojasuchus tenuisiceps* will be carried out in an upcoming contribution considering its postcranial anatomy, as well as the cranial features here described.

## Acknowledgments

We thank the following curators and collection managers for allowing us to study the specimens under their care: Jaime Powell (PVL), Gabriela Cisterna (PULR), Rainer Schoch (SMNS),

Oliver Rauhut (BSGP), Lorna Steele (NHMUK PV R), and Susan Beardmore (EM). We also thank Clínica La Sagrada Familia (Buenos Aires, <http://www.sagradafamilia.com.ar/>) and MATSA (San Miguel de Tucumán, <http://www.matsa.com.ar/>) for assistance while carrying out the CTscans of the specimens. We thank Maximiliano Iberlucea for the detailed preparation of the specimen PVL 3828 and Martin Carrizo for his assistance with editing the figures.

## Author Contributions

Conceived and designed the experiments: MBvB JBD. Performed the experiments: MBvB JBD. Analyzed the data: MBvB JBD. Contributed reagents/materials/analysis tools: MBvB JBD. Wrote the paper: MBvB.

## References

1. Nesbitt SJ The early evolution of archosaurs: Relationships and the origin of major clades. *Bull Am Mus Nat Hist*. 2011 Apr 29; 352:1–292. <http://dx.doi.org/10.1206/352.1>
2. Butler RJ, Sullivan C, Ezcurra MD, Liu J, Lecuona A, Sookias RB. New clade of enigmatic early archosaurs yields insights into early pseudosuchian phylogeny and the biogeography of the archosaur evolution. *BMC Evol Biol*. 2014 Jun 10; 14:128. doi: [10.1186/1471-2148-14-128](https://doi.org/10.1186/1471-2148-14-128) PMID: [24916124](https://pubmed.ncbi.nlm.nih.gov/24916124/)
3. Baczkó MB, von Ezcurra MD. Ornithosuchidae: a group of Triassic archosaurs with a unique ankle joint. In: Nesbitt SJ, Desojo JB and Irmis RB, editors. *Anatomy, Phylogeny and Palaeobiology of Early Archosaurs and their Kin*. London: Geological Society Special Publications 379. 2013. p.187–202.
4. Baczkó MB, von Desojo JB, Pol D. Anatomy and phylogenetic position of *Venaticosuchus rusconii* Bonaparte, 1970 (Archosauria, Pseudosuchia) from the Ischigualasto Formation (Late Triassic), La Rioja, Argentina. *J Verteb Paleontol*. 2014 Sept 19; 34,6:1342–1356. doi: [10.1080/02724634.2014.860150](https://doi.org/10.1080/02724634.2014.860150)
5. Sereno PC. Basal archosaurs: phylogenetic relationships and functional implications. *J Verteb Paleontol*. 1991 Dec 31; 11,S4:1–53. doi: [10.1080/02724634.1991.10011426](https://doi.org/10.1080/02724634.1991.10011426)
6. Bonaparte JF. 1967. Dos nuevas 'faunas' de reptiles triásicos de Argentina. *Gondwana Stratigraphy*, 1 Gondwana Symposium, Mar del Plata, 283–325. Spanish.
7. Bonaparte JF. 1970. Annotated list of the South American Triassic tetrapods. *Proceedings and Papers of the 2 Gondwana Symposium*, 665–682.
8. Huxley TH. 1877. The crocodylian remains found in Elgin sandstones, with remarks on the ichnites of Cummingstone. *Mem Geol Survey UK, Monograph*, III, 5.
9. Langer MC. Studies on Late Triassic tetrapod biochronology. II. The Ischigualastian and a Carnian global correlation. *J South Am Earth Sci*. 2005 Jun 30; 19:219–239.
10. Kent DV, Malnis PS, Colombi CE, Alcober OA, Martínez RN. Age constraints on the dispersal of dinosaurs in the Late Triassic from magnetostratigraphy of the Los Colorados Formation (Argentina). *Proc Natl Acad Sci USA*. 2014 Jun 3; 111(22):7958–63. doi: [10.1073/pnas.1402369111](https://doi.org/10.1073/pnas.1402369111) PMID: [24843149](https://pubmed.ncbi.nlm.nih.gov/24843149/)
11. Bonaparte JF. 1973. Edades/Reptil para el Triásico de Argentina y Brasil. 5° Congreso Geológico Argentino (Buenos Aires 1972), *Actas* 3: 123–125. Spanish.
12. von Huene F. Die Dinosaurier der europäischen Triasformation mit Berücksichtigung der aussereuropäischen Vorkommnisse. *Geologische und Paläontologische Abhandlungen*. 1908; 1(Suppl.):1–419. German.
13. Walker AD. Triassic reptiles from the Elgin area *Ornithosuchus* and the origin of Carnosaurs. *Philos Trans R Soc Lond B Biol Sci*. 1964 Nov 26; 744:53–134. doi: [10.1098/rstb.1964.0009](https://doi.org/10.1098/rstb.1964.0009)
14. Martínez RN, Sereno PC, Alcober OA, Colombi CE, Renne PR, Montañez IP, et al. A basal dinosaur from the dawn of the Dinosaur Era in southwestern Pangaea. *Science* 2011 Jan 14; 331,206–210. doi: [10.1126/science.1198467](https://doi.org/10.1126/science.1198467) PMID: [21233386](https://pubmed.ncbi.nlm.nih.gov/21233386/)
15. von Baczkó MB. Descripción anatómica y análisis filogenético de *Venaticosuchus rusconii* Bonaparte 1970 (Archosauria: Pseudosuchia) de la Formación Ischigualasto (Triásico Tardío), La Rioja, Argentina [Dissertation]. Facultad de Ciencias Exactas y Naturales: Universidad de Buenos Aires. 2012. Spanish.
16. von Baczkó MB, Taborda JRA, Desojo JB. Anatomía de las cavidades olfatorias de los ornithosuchidos *Riojasuchus tenuisiceps* Bonaparte y *Venaticosuchus rusconii* Bonaparte (Archosauria: Pseudosuchia): resultados preliminares. *Ameghiniana*. 2012; 49:4R. Spanish.

17. Bonaparte JF. Los tetrápodos del sector superior del a Formación Los Colorados, La Rioja, Argentina. (Triásico Superior) I Parte. Opera Lilloana. 1972; 22, 13–56. Spanish
18. Arcucci AB, Marsicano CA, Caselli AT. Tetrapod association and palaeoenvironment of the Los Colorados Formation (Argentina): a significant sample from Western Gondwana at the end of the Triassic. *Geobios*. 2004 Oct 31; 37:557–568. doi: [10.1016/j.geobios.2003.04.008](https://doi.org/10.1016/j.geobios.2003.04.008)
19. Paulina-Carabajal A, Currie PJ. New information on the braincase of *Sinraptor dongi* (Theropoda: Allosauroidae): Ethmoidal region, endocranial anatomy, and pneumaticity. *Vertebrata Palasiatica*. 2012; 4:85–101.
20. Paulina-Carabajal A, Carballido JL, Currie PJ. Braincase, neuroanatomy and neck posture of *Aargasaurus cazui* (Sauropoda, Dicraeosauridae) and its implications for understanding head posture in sauropods. *J Verteb Paleontol*. 2015 Jun 7; 34(4):870–882, doi: [10.1080/02724634.2014.838174](https://doi.org/10.1080/02724634.2014.838174)
21. Cope ED. Synopsis of the extinct batrachia, reptilia and aves of North America. Philadelphia. McCalla & Stavely, printers; 1871.
22. Gauthier J, Padian K. Phylogenetic, functional, and aerodynamic analyses of the origin of birds and their flight. In: Hecht JHOMK, Viohl G. & Wellnhofer P editors. *The Beginning of Birds*. Eichstatt: Freunde des Jura Museums; 1985. p.185–197.
23. Zittel KA, von. *Handbuch der Paläontologie. Abteilung 1: Paläozoologie Band III. Vertebrata (Pisces, Amphibia, Reptilia, Aves)*. Munich and Leipzig, Oldenbourg. 1887–1890. 1890pp. German.
24. Gow CE. The morphology and relationships of *Youngina capensis* Broom and *Prolacerta broomi* Parlington. *Palaeontologia Africana*. 1975; 18:89–131.
25. Welman J. The taxonomy of the South African proterosuchids (Reptilia, Archosauromorpha). *J Verteb Paleontol*. 1998 Jun 15; 18(2):340–347. doi: [10.1080/02724634.1998.10011062](https://doi.org/10.1080/02724634.1998.10011062)
26. Ezcurra MD, Butler RJ. Taxonomy of the proterosuchid archosauriforms (Diapsida: Archosauromorpha) from the earliest Triassic of South Africa, and implications for the early archosauriform radiation. *Palaeontology* 2015 Jan 1; 58(1):141–171. doi: [10.1111/pala.12130](https://doi.org/10.1111/pala.12130)
27. Gower DJ. The braincase of the early archosaurian reptile *Erythrosuchus africanus*. *J Zool Lond* 1997 Jul 1; 242:557–576. doi: [10.1111/j.1469-7998.1997.tb03855.x](https://doi.org/10.1111/j.1469-7998.1997.tb03855.x)
28. Gower DJ. Osteology of the early archosaurian reptile *Erythrosuchus africanus* Broom. *Annals of the South African Museum*. 2003; 110:1–88.
29. Gower DJ, Hancox PJ, Botha-Brink J, Sennikov AG, Butler RJ. A new species of *Garjainia* Ochev, 1958 (Diapsida: Archosauriformes: Erythrosuchidae) from the Early Triassic of South Africa. *PLoS ONE*. 2014; 9(11): e111154. doi: [10.1371/journal.pone.0111154](https://doi.org/10.1371/journal.pone.0111154) PMID: [25386937](https://pubmed.ncbi.nlm.nih.gov/25386937/)
30. Weems RA. An unusual newly discovered archosaur from the Upper Triassic of Virginia, U.S.A. *Trans Am Philos Soc*. 1980 Jan 1; 70(7):1–53. doi: [10.2307/1006472](https://doi.org/10.2307/1006472)
31. Dilkes D, Sues H-D. Redescription and phylogenetic relationships of *Doswellia kaltenbachii* (Diapsida: Archosauriformes) from the Upper Triassic of Virginia. *J Verteb Paleontol*. 2009 Mar 12; 29(1):58–79. doi: [10.1080/02724634.2009.10010362](https://doi.org/10.1080/02724634.2009.10010362)
32. Romer AS. The Chañares (Argentina) Triassic reptile fauna XI. Two new long-snouted thecodont, *Chanaresuchus* and *Gualosuchus*. *Breviora*. 1971; 379:1–22.
33. Trotteyn MJ, Haro JA. The braincase of *Chanaresuchus ischigualastensis* (Archosauriformes) from the Late Triassic of Argentina. *J Verteb Paleontol* 2012 Jul 1; 32(4):867–882. doi: [10.1080/02724634.2012.670178](https://doi.org/10.1080/02724634.2012.670178)
34. Dilkes D, Arcucci A. *Proterochampsia barrionuevoi* (Archosauriformes: Proterochampsia) from the Late Triassic (Carnian) of Argentina and a phylogenetic analysis of Proterochampsia. *Palaeontology*. 2012 Jul 21; 55(4):853–85.
35. Arcucci A. Un nuevo Proterochampsidae (Reptilia-Archosauriformes) de la fauna local de Los Chañares (Triásico Medio) La Rioja, Argentina. *Ameghiniana*. 1990 Aug 15; 27(3–4):365–37.
36. Ewer RF. The anatomy of the thecodont reptile *Euparkeria capensis* Broom. *Philos Trans R Soc Lond B Biol Sci*. 1965 Feb 18; 248(751):379–435. doi: [10.1098/rstb.1965.0003](https://doi.org/10.1098/rstb.1965.0003)
37. Welman J. *Euparkeria* and the origin of birds. *S Afr J Sci*. 1995 Oct 1; 91(10):533–7.
38. Gower DJ, Weber E. The braincase of *Euparkeria*, and the evolutionary relationships of birds and crocodylians. *Biol rev*. 1998 Nov 1; 73:367–411. doi: [10.1111/j.1469-185X.1998.tb00177.x](https://doi.org/10.1111/j.1469-185X.1998.tb00177.x)
39. Hungerbühler A, Hunt AP. Two new phytosaur species (Archosauria, Crurotarsi) from the Upper Triassic of southwest Germany. *Neues Jahrb Geol Palaontol Abh*. 2000 Aug 1; 8:467–84.
40. Hungerbühler A. The Late Triassic phytosaur *Myrstriosuchus westphali*, with a revision of the genus. *Palaeontology*. 2002 Mar 1; 45(2):377–418. doi: [10.1111/1475-4983.00242](https://doi.org/10.1111/1475-4983.00242)
41. Romer AS. The Chañares (Argentina) Triassic reptile fauna. XIII. An early ornithosuchid pseudosuchian, *Gracilisuchus stipanicorum*, gen. et sp. nov. *Breviora*. 1972; 389:1–24.

42. Lecuona A, Desojo JB. Hind limb osteology of *Gracilisuchus stipanicorum* (Archosauria: Pseudosuchia). *Earth Environ Sci Trans R Soc Edinb*. 2011 Jun 1; 102(2):105–28. <http://dx.doi.org/10.1017/S1755691011000181>
43. Young CC. On a new pseudosuchian from Turfan, Sinkiang (Xinjiang). *Memoirs of the Institute of Vertebrate Paleontology and Paleoanthropology of the Academia Sinica, Series B*. 1973; 10:15–37.
44. Wu X-C, Russell AP. Redescription of *Turfanosuchus dabaensis* (Archosauriformes) and new information on its phylogenetic relationships. *J Verteb Paleontol*. 2001; 21(1):40–50.
45. Desojo JB, Báez A. Cranial morphology of the Late Triassic South American archosaur *Neoaetosauroides engaeus*: evidence for aetosaurian diversity. *Palaeontology*. 2007 Jan 1; 50(1):267–76. doi: [10.1111/j.1475-4983.2006.00608.x](https://doi.org/10.1111/j.1475-4983.2006.00608.x)
46. Hunt AP, Lucas SG. Re-evaluation of “*Typothorax*” meadei, a Late Triassic aetosaur from the United States. *Paläontologische Zeitschrift*. 1990 Dec 1; 64(3–4):317–28. doi: [10.1007/BF02985722](https://doi.org/10.1007/BF02985722)
47. Parrish JM. Cranial osteology of *Longosuchus meadei* and the phylogeny and distribution of Aetosauria. *J Verteb Paleontol*. 2010 Jun 22; 14(2):196–209. doi: [10.1080/02724634.1994.10011552](https://doi.org/10.1080/02724634.1994.10011552)
48. Walker AD. Triassic reptiles from the Elgin area: *Stagonolepis*, *Dasygnathus* and their allies. *Philos Trans R Soc Lond B Biol Sci*. 1961 Aug 31; 244(709):103–204. doi: [10.1098/rstb.1961.0007](https://doi.org/10.1098/rstb.1961.0007)
49. Schoch RR. Osteology of the small archosaur *Aetosaurus* from the Upper Triassic of Germany. *Neues Jahrb Geol Palaontol Abh*. 2007 Oct 1; 246(1):1–35. <http://dx.doi.org/10.1127/0077-7749/2007/0246-0001>
50. Parker WG. How many valid aetosaur species are there? Reviewing the alpha-taxonomy of the Aetosauria (Archosauria: Pseudosuchia) and its implications for Late Triassic global biostratigraphy. *J Verteb Paleontol*. 2008; 28(3):125A.
51. Li C, Wu X-C, Cheng Y-N, Sato T, Wang L. An unusual archosaurian from the marine Triassic of China. *Naturwissenschaften*. 2006 Apr 1; 93:200–206. doi: [10.1007/s00114-006-0097-y](https://doi.org/10.1007/s00114-006-0097-y) PMID: [16538373](https://pubmed.ncbi.nlm.nih.gov/16538373/)
52. Nesbitt SJ. Osteology of the Middle Triassic pseudosuchian archosaur *Arizonasaurus babbitti*. *Histor Biol*. 2005 Jan 1; 17:19–47. doi: [10.1080/08912960500476499](https://doi.org/10.1080/08912960500476499)
53. Gower DJ, Nesbitt SJ. The braincase of *Arizonasaurus babbitti*—further evidence for the non-monophyly of ‘rauisuchian’ archosaurs. *J Verteb Paleontol*. 2010 Mar 30; 26(1):79–87.
54. Nesbitt SJ, Norell MA. Extreme convergence in the body plans of an early suchian (Archosauria) and ornithomimid dinosaurs (Theropoda). *Proc R Soc Lond B Biol Sci*. 2006 May 7; 273(1590):1045–8. doi: [10.1098/rspb.2005.3426](https://doi.org/10.1098/rspb.2005.3426)
55. Lucas SG, Spielmann JA, Hunt AP. Taxonomy of *Shuvosaurus*, a Late Triassic archosaur from the Chinle Group, American Southwest. *The Global Triassic. New Mexico Museum of Natural History and Science Bulletin*. 2007; 41:259–61.
56. Nesbitt SJ. The anatomy of *Effigia okeeffeae* (Archosauria, Suchia), theropod-like convergence, and the distribution of related taxa. *Bull Am Mus Nat Hist*. 2007 Jan 24; 302:1–84. [http://dx.doi.org/10.1206/0003-0090\(2007\)302\[1:TAOEOA\]2.0.CO;2](http://dx.doi.org/10.1206/0003-0090(2007)302[1:TAOEOA]2.0.CO;2)
57. Desojo JB, Arcucci AB. New material of *Luperosuchus fractus* (Archosauria: Crurotarsi) from the Middle Triassic of Argentina: the earliest known South American ‘rauisuchian’. *J Verteb Paleontol*. 2009 Dec 12; 29(4):1311–1315. doi: [10.1671/039.029.0422](https://doi.org/10.1671/039.029.0422)
58. Nesbitt SJ, Brusatte SL, Desojo JB, Liparini A, De França MA, Weinbaum JC, et al. Rauisuchia. In: Nesbitt SJ, Desojo JB and Irmis RB, editors. *Anatomy, Phylogeny and Palaeobiology of Early Archosaurs and their Kin*. London: Geological Society Special Publications. 2013; 379:241–74.
59. Barberena MC. A huge thecodont skull from the Triassic of Brazil. *Pesquisas*. 1978; 7:111–29.
60. Mastrantonio BM, Schultz CL, Desojo JB, Garcia JB. The braincase of *Prestosuchus chiquiensis* (Archosauria: Suchia). *Geol Soc Spec Publ* 2013; 379(1):425–40.
61. Alcober O. Redescription of the skull of *Saurosuchus galilei* (Archosauria: Rauisuchidae). *J Verteb Paleontol*. 2000 Jun 27; 20(2):302–16.
62. Gower DJ. Braincase evolution in suchian archosaurs (Reptilia: Diapsida): evidence from the rauisuchian *Batrachotomus kupferzellensis*. *Zool J Linn Soc*. 2002 Sep 1; 136:49–76. doi: [10.1046/j.1096-3642.2002.00025.x](https://doi.org/10.1046/j.1096-3642.2002.00025.x)
63. Bonaparte JF. Descripción de *Fasolasuchus tenax* y su significado en la sistemática y evolución de los Thecodontia. *Museo Argentino de Ciencias Naturales "Bernardino Rivadavia", Instituto Nacional de Investigación de las Ciencias Naturales*; 1981; 3(2):55–101.
64. Lautenschlager S, Rauhut OW. Osteology of *Rauisuchus tiradentes* from the Late Triassic (Carnian) Santa Maria Formation of Brazil, and its implications for rauisuchid anatomy and phylogeny. *Zool J Linn Soc*. 2015 Jan 1; 173(1):55–91. doi: [10.1111/zoj.12196](https://doi.org/10.1111/zoj.12196)

65. Sulej T. A new rauisuchian reptile (Diapsida: Archosauria) from the Late Triassic of Poland. *J Verteb Paleontol.* 2005 Mar 11; 25(1):78–86.
66. Brusatte SL, Butler RJ, Sulej T, Niedzwiedzki G. The taxonomy and anatomy of rauisuchian archosaurs from the Late Triassic of Germany and Poland. *Acta Palaeontologica Polonica.* 2009 Jun; 54(2):221–30. <http://dx.doi.org/10.4202/app.2008.0065>
67. Weinbaum JC. The skull of *Postosuchus kirkpatricki* (Archosauria: Paracrocodyliformes) from the Upper Triassic of the United States. *PaleoBios.* 2011; 30(1):18–44.
68. Sues HD, Olsen PE, Carter JG, Scott DM. A new crocodylomorph archosaur from the Upper Triassic of North Carolina. *J Verteb Paleontol.* 2003 Jun 17; 23(2):329–343. doi: [10.1671/0272-4634\(2003\)023\[0329:ANCAFT\]2.0.CO;2](https://doi.org/10.1671/0272-4634(2003)023[0329:ANCAFT]2.0.CO;2)
69. Clark JM, Sues H-D, Berman DS. A new specimen of *Hesperosuchus agilis* from the Upper Triassic of New Mexico and the interrelationships of basal crocodylomorph archosaurs. *J Verteb Paleontol.* 2000 Jan 19; 20(4):683–704. doi: [10.1671/0272-4634\(2000\)020\[0683:ANSOHA\]2.0.CO;2](https://doi.org/10.1671/0272-4634(2000)020[0683:ANSOHA]2.0.CO;2)
70. Walker AD. A revision of *Sphenosuchus acutus* Haughton, a crocodylomorph reptile from the Elliot Formation (Late Triassic or Early Jurassic) of South Africa. *Philos Trans R Soc Lond B Biol Sci.* 1990 Oct 29; 330(1256):1–120.
71. Wu X-C, Chatterjee S. *Dibothrosuchus elaphros*, a crocodylomorph from the Lower Jurassic of China and the phylogeny of Sphenosuchia. *J Verteb Paleontol.* 1993 Mar 18; 13(1):58–89. doi: [10.1080/02724634.1993.10011488](https://doi.org/10.1080/02724634.1993.10011488)
72. Clark JM, Sues H-D. Two new basal crocodylomorph archosaurs from the Lower Jurassic and the monophyly of the Sphenosuchia. *Zool J Linn Soc.* 2002 Sep 1; 136:77–95. doi: [10.1046/j.1096-3642.2002.00026.x](https://doi.org/10.1046/j.1096-3642.2002.00026.x)
73. Gow CE. The skull of *Protosuchus haughtoni*, an early Jurassic crocodyliform from southern Africa. *J Verteb Paleontol.* 2000; 20(1):49–56. doi: [10.1671/0272-4634\(2000\)020\[0049:TSOPHA\]2.0.CO;2](https://doi.org/10.1671/0272-4634(2000)020[0049:TSOPHA]2.0.CO;2)
74. Brochu CA. Phylogenetics, taxonomy, and historical biogeography of Alligatoroidea. *J Verteb Paleontol.* 1999 Jun 14; 19(S2):9–100. doi: [10.1080/02724634.1999.10011201](https://doi.org/10.1080/02724634.1999.10011201)
75. Bona P, Desojo JB. Osteology and cranial musculature of *Caiman latirostris* (Crocodylia: Alligatoridae). *J Morphol.* 2011 Jul 1; 272(7):780–95. doi: [10.1002/jmor.10894](https://doi.org/10.1002/jmor.10894) PMID: 21491476
76. Sereno PC, Arcucci AB. Dinosaurian precursors from the Middle Triassic of Argentina: *Marasuchus lilloensis*, gen. nov. *J Verteb Paleontol.* 1994 Mar 31; 14(1):53–73. doi: [10.1080/02724634.1994.10011538](https://doi.org/10.1080/02724634.1994.10011538)
77. Romer AS. The Chañares (Argentina) Triassic reptile fauna XIV. *Lewisuchus admixtus* gen. et sp. nov., a further thecodont from the Chañares beds. *Breviora.* 1972; 39:1–13.
78. Bittencourt JS, Arcucci AB, Marsicano CA, Langer MC. Osteology of the Middle Triassic archosaur *Lewisuchus admixtus* Romer (Chañares Formation, Argentina), its inclusivity, and relationships amongst early dinosauromorphs. *J Syst Palaeontol.* 2015 Mar 4; 13(3):189–219. doi: [10.1080/14772019.2013.878758](https://doi.org/10.1080/14772019.2013.878758)
79. Dzik J. A beaked herbivorous archosaur with dinosaur affinities from the Early Late Triassic of Poland. *J Verteb Paleontol.* 2003 Sep 12; 23(3):556–574. doi: [10.1671/A1097](https://doi.org/10.1671/A1097)
80. Dzik J, Sulej T. A review of the early Late Triassic Krasiejów biota from Silesia, Poland. *Phytopatologia Polonica.* 2007; 64:3–27.
81. Ferigolo J, Langer MC. A Late Triassic dinosauriform from south Brazil and the origin of the ornithischian predeontary bone. *Hist Biol.* 2007 Jan 1; 19(1):23–33. doi: [10.1080/08912960600845767](https://doi.org/10.1080/08912960600845767)
82. Langer MC, Ferigolo J. The Late Triassic dinosauromorph *Sacisaurus agudoensis* (Caturrita Formation; Rio Grande do Sul, Brazil): anatomy and affinities. In: Nesbitt SJ, Desojo JB and Irmis RB, editors. *Anatomy, Phylogeny and Palaeobiology of Early Archosaurs and their Kin.* London: Geological Society Special Publications. 2013; 379:353–92.
83. Sereno PC, Forster CA, Rogers RR, Monetta AM. Primitive dinosaur skeleton from Argentina and the early evolution of Dinosauria. *Nature.* 1993 Jan 7; 361:64–66. doi: [10.1038/361064a0](https://doi.org/10.1038/361064a0)
84. Sereno PC, Martinez RN, Alcober OA. Osteology of *Eoraptor lunensis* (Dinosauria, Sauropodomorpha). *Mem Soc Verteb Paleontol.* 2013 Nov 1; 12:87–179. doi: [10.1080/02724634.2013.820113](https://doi.org/10.1080/02724634.2013.820113)
85. Crompton AW, Charig AJ. A new ornithischian from the Upper Triassic of South Africa. *Nature.* 1962 Dec 15; 196:1074–1077. doi: [10.1038/1961074a0](https://doi.org/10.1038/1961074a0)
86. Norman DB, Crompton AW, Butler RJ, Porro LB, Charig AJ. The Lower Jurassic ornithischian dinosaur *Heterodontosaurus tucki* Crompton & Charig, 1962: cranial anatomy, functional morphology, taxonomy, and relationships. *Zool J Linn Soc.* 2011 Sep 1; 163:182–276. doi: [10.1111/j.1096-3642.2011.00697.x](https://doi.org/10.1111/j.1096-3642.2011.00697.x)

87. Gower DJ, Sennikov AG. Sarmatosuchus and the early history of the Archosauria. *J Verteb Paleontol.* 1997 Apr 16; 17(1):60–73. doi: [10.1080/02724634.1997.10010954](https://doi.org/10.1080/02724634.1997.10010954)
88. Desojo JB, Ezcurra MD. A reappraisal of the taxonomic status of Aetosauroides (Archosauria: Aetosauria) specimens from the Late Triassic of South America and their proposed synonymy with Stagonolepis. *J Verteb Paleontol.* 2011 May 1; 31:596–609. doi: [10.1080/02724634.2011.572936](https://doi.org/10.1080/02724634.2011.572936)
89. Desojo JB, Heckert AB, Martz JW, Parker WG, Schoch RR, Small BJ, et al. 2013. Aetosauria: a clade of armoured pseudosuchians from the Late Triassic continental beds. In: Nesbitt SJ, Desojo JB and Irmis RB, editors. *Anatomy, Phylogeny and Palaeobiology of Early Archosaurs and their Kin.* London: Geological Society Special Publications 379. 2013. p.203–239.
90. Gower DJ, Walker AD. New data on the braincase of the aetosaurian archosaur (Reptilia: Diapsida) *Stagonolepis robertsoni* Agassiz. *Zool J Linn Soc.* 2002 Sep 1; 136(1):7–23. doi: [10.1046/j.1096-3642.2002.00023.x](https://doi.org/10.1046/j.1096-3642.2002.00023.x)
91. Nesbitt SJ, Turner AH, Weinbaum JC. A survey of skeletal elements in the orbit of Pseudosuchia and the origin of the crocodylian palpebral. *Earth Environ Sci Trans R Soc Edinb.* 2012 Sep 1; 103:365–381.
92. Benton MJ, Clark JM. Archosaur phylogeny and the relationships of the Crocodylia. In: Benton MJ editor. *Phylogeny and Classification of the Tetrapods.* Systematics Association Special Volume 35A. Oxford: Clarendon Press; 1988. p. 295–338.
93. Sereno PC, Novas FE. The skull and neck of the basal theropod *Herrerasaurus ischigualastensis*. *J Verteb Paleontol.* 1993 Jan 14; 13(4):451–476. doi: [10.1080/02724634.1994.10011525](https://doi.org/10.1080/02724634.1994.10011525)
94. Holliday CM, Witmer LM. Cranial kinesis in dinosaurs: intracranial joints, protractor muscles, and their significance for cranial evolution and function in diapsids. *J Verteb Paleontol.* 2008 Dec 12; 28(4):1073–1088. doi: [10.1671/0272-4634-28.4.1073](https://doi.org/10.1671/0272-4634-28.4.1073)
95. Gower DJ, Sennikov AG. Morphology and phylogenetic informativeness of early archosaur braincases. *Palaeontology.* 1996 Dec 1; 39:883–906.
96. Trotteyn MJ, Ezcurra MD. Osteology of *Pseudochampsia ischigualastensis* gen. et comb. nov. (Archosauriformes: Proterochampsidae) from the Early Late Triassic Ischigualasto Formation of Northwestern Argentina. *PLoS ONE.* 2014; 9(11): e111388. doi: [10.1371/journal.pone.0111388](https://doi.org/10.1371/journal.pone.0111388) PMID: [25426846](https://pubmed.ncbi.nlm.nih.gov/25426846/)
97. Rauhut OWM. The interrelationships and evolution of basal theropod dinosaurs. *Special Papers in Palaeontology.* 2003 Nov 1; 69:1–214.
98. Holliday CM, Nesbitt SJ. Morphology and diversity on the mandibular symphysis of archosauriforms. In: Nesbitt SJ, Desojo JB and Irmis RB, editors. *Anatomy, Phylogeny and Palaeobiology of Early Archosaurs and their Kin.* London: Geological Society Special Publications 379. 2013. p.555–571.
99. Case EC. On an endocranial cast from a reptile, *Desmotosuchus spuriensis*, from the Upper Triassic of Western Texas. *J Comp Neurol.* 1921 Jun 1; 33(2):133–147.
100. Desojo JB, von Baczko MB, Taborda JRA, Gower DJ. Paleoneuroanatomy of *Neoaetosauroides engaeus* Bonaparte (Late Triassic-Argentina) and comparison with other aetosaurs and Crocodylia. *Anat Rec.* 2013; 296, Special Feature.
101. Paulina-Carabajal A. Guía para el estudio de la neuroanatomía de dinosaurios Saurischia, con énfasis en formas sudamericanas. In: Fernandez M and Herrera Y, editors. *Reptiles Extintos—Volumen especial en homenaje a Zulma Gasparini.* Publicación Especial de la Asociación Paleontológica Argentina 2015. <http://dx.doi.org/10.5710/PEAPA.15.06.2015.102>
102. Bona P, Degrange FJ, Fernández MS. Skull anatomy of the bizarre crocodylian *Mourasuchus nativus* (Alligatoridae, Caimaninae). *The Anatomical Record.* 2013 Feb 1; 296(2):227–39. doi: [10.1002/ar.22625](https://doi.org/10.1002/ar.22625) PMID: [23193096](https://pubmed.ncbi.nlm.nih.gov/23193096/)
103. Brusatte SL, Benton MJ, Desojo JB, Langer MC. The higher-level phylogeny of Archosauria (Tetrapoda: Diapsida). *J Syst Palaeontol.* 2010 Mar 15; 8(1):3–47. doi: [10.1080/14772010903537732](https://doi.org/10.1080/14772010903537732)
104. Trotteyn MJ, Desojo JB, Bona P. Análisis del potencial cinético craneano en especies de cocodrilos actuales y su aplicación en arcosauriformes fósiles. X Congreso Argentino de Paleontología y Bioestratigrafía-VII Congreso Latinoamericano de Paleontología 2010.
